# Supplementary material
Source: publisher figshare collection journal article supplement (https://gsapubs.figshare.com/ndownloader/files/23301551)
Supplement: Supplementary file 1 [file 23301551]

## Sheet: Table DR1 Starting compositions
Ontong Java starting composition and the composition of starting materials in the literature*																Compositions re-calculated to 100% (minus P, F, Cr)^										Percentage difference from 1187-8 (5%)							Percentage difference from 1187-8 (10%)
Ref	Sample	Starting material used in experiments**	SiO2	TiO2	Al2O3	FeO(t)	MnO	MgO	CaO	Na2O	K2O	P2O5	Cr2O3	F	Total	SiO2	TiO2	Al2O3	FeO(t)	MnO	MgO	CaO	Na2O	K2O	Total	SiO2	Al2O3	FeO(t)	MgO	CaO	Na2O		SiO2	Al2O3	FeO(t)	MgO	CaO	Na2O
FG(2004)	1187-8	Fresh tholeiitic basaltic glass (oceanic plateau)	49.22	0.746	14.87	9.76283	0.172	9.89	12.39	1.64	0.09	0.06			98.8408	49.8275	0.755207	15.0535	9.88332	0.174123	10.0121	12.5429	1.66024	0.0911108	100
RW(1995)	1#	Meta-calcalkaline basaltic andesite (Amphibolite) (N-MORB/back-arc basin)	51.19	1.18	16.62	11.32	0.23	6.59	5.49	4.33	0.82				97.77	52.3576	1.20691	16.9991	11.5782	0.235246	6.74031	5.61522	4.42876	0.838703	100	5.0777	12.9242	17.1488	-32.6781	-55.232	166.754		5.0777	12.9242	17.1488	-32.6781	-55.232	166.754
RW(1995)	2	Meta-tholeiitic basalt (Amphibolite) (E-MORB)	48.6	2.06	17.03	10.69	0.21	6.07	9.66	3.3	0.21				97.83	49.678	2.10569	17.4077	10.9271	0.214658	6.20464	9.87427	3.3732	0.214658	100	-0.299973	15.639	10.5612	-38.0284	-21.2761	103.175		-0.299973	15.639	10.5612	-38.0284	-21.2761	103.175
RW(1995)	3	Meta-tholeiitic basalt (Amphibolite) (MORB)	48.3	0.72	15.3	10.7	0.19	8.4	12.6	2.27	0.08				98.56	49.0057	0.730519	15.5235	10.8563	0.192776	8.52273	12.7841	2.30317	0.0811688	100	-1.64929	3.12226	9.84493	-14.8754	1.92277	38.7248		-1.64929	3.12226	9.84493	-14.8754	1.92277	38.7248
RW(1995)	4	Meta-tholeiitic basalt (Amphibolite) (Archaean E-MORB)	47.6	1.19	14.18	13.77	0.19	6.86	10.99	2.56	0.19				97.53	48.8055	1.22014	14.5391	14.1187	0.194812	7.03373	11.2683	2.62483	0.194812	100	-2.05105	-3.41722	42.8541	-29.7474	-10.1618	58.0995		-2.05105	-3.41722	42.8541	-29.7474	-10.1618	58.0995
SD(1994)	N/A	Meta-calcalkaline basalt (Amphibolite)	46.88	1.22	15	13.091	0.26	8.25	11.28	2.51	0.8				99.291	47.2147	1.22871	15.1071	13.1845	0.261856	8.30891	11.3605	2.52792	0.805712	100	-5.24357	0.355914	33.4015	-17.011	-9.42664	52.2624		-5.24357	0.355914	33.4015	-17.011	-9.42664	52.2624
WW(1994)	N/A	Meta-tholeiitic basalt (Amphibolite)	48.4	0.4	14.6	8.4	0.2	10.7	14.3	1	0.1				98.1	49.3374	0.407747	14.8828	8.56269	0.203874	10.9072	14.577	1.01937	0.101937	100	-0.983535	-1.13432	-13.3622	8.94095	16.2167	-38.6012		-0.983535	-1.13432	-13.3622	8.94095	16.2167	-38.6012
A(2012)	PC-227	Hadean Greenschist (meta-calcalkaline basaltic andesite)	52.47	0.4	17.19	9.44	0.21	11.13	7.45	0.96	0.74	0.01			100	52.4752	0.40004	17.1917	9.44094	0.210021	11.1311	7.45075	0.960096	0.740074	100	5.31387	14.2039	-4.47603	11.177	-40.598	-42.1713		5.31387	14.2039	-4.47603	11.177	-40.598	-42.1713
A(2012)	PC-162	Hadean Greenschist (meta-calcalkaline basaltic andesite)	53.25	0.47	15.96	10.24	0.22	9.48	8.43	1.07	0.88				100	53.25	0.47	15.96	10.24	0.22	9.48	8.43	1.07	0.88	100	6.86874	6.02166	3.60886	-5.31423	-32.7908	-35.5515		6.86874	6.02166	3.60886	-5.31423	-32.7908	-35.5515
A(2012)	Station 25	Modern boninite (Arc)	55.2	0.45	11	7.85	0.17	13.08	9.73	1.53	0.72	0.26			99.99	55.3494	0.451218	11.0298	7.87125	0.17046	13.1154	9.75634	1.53414	0.721949	100	11.0822	-26.7296	-20.3583	30.9961	-22.2163	-7.59522		11.0822	-26.7296	-20.3583	30.9961	-22.2163	-7.59522
LS(2012)	DSE4	Tholeiitic eclogite (MORB)	50	2.5	12.8	16.2	0.3	5.7	9.6	2	0.01	0.3			99.41	50.449	2.52245	12.9149	16.3455	0.302694	5.75119	9.68621	2.01796	0.0100898	100	1.24733	-14.2065	65.3844	-42.5574	-22.7755	21.5462		1.24733	-14.2065	65.3844	-42.5574	-22.7755	21.5462
BL(1991)	557	Meta-tholeiitic andesite (Greenschist) (Arc)	57.02	0.6	15.39	8.01	0.17	5.52	9.2	2.54	0.44	0.18			99.07	57.66	0.606735	15.5627	8.09991	0.171908	5.58196	9.30327	2.56851	0.444939	100	15.7193	3.38272	-18.0447	-44.2477	-25.8285	54.7071		15.7193	3.38272	-18.0447	-44.2477	-25.8285	54.7071
BL(1991)	555	Meta-tholeiitic andesite (Greenschist) (Arc)	55.11	1.66	14.94	11.28	0.21	4.01	6.07	4.29	0.03	0.3			97.9	56.4652	1.70082	15.3074	11.5574	0.215164	4.10861	6.21926	4.39549	0.0307377	100	13.3213	1.68631	16.9382	-58.9634	-50.4162	164.75		13.3213	1.68631	16.9382	-58.9634	-50.4162	164.75
BL(1991)	478	Meta-tholeiitic basaltic andesite (U.Greenschist) (Arc)	52.47	1.74	15.29	11.79	0.22	5.29	9.21	2.55	0.16	0.29			99.01	53.1503	1.76256	15.4882	11.9429	0.222853	5.35859	9.32942	2.58306	0.162075	100	6.66869	2.88784	20.8386	-46.4787	-25.6201	55.5836		6.66869	2.88784	20.8386	-46.4787	-25.6201	55.5836
BL(1991)	466	Meta-tholeiitic basalt (Hbl. hornfels) (Arc)	49.48	1.18	17.76	12.49	0.26	4.74	10.9	1.96	0.15	0.3			99.22	50.0202	1.19288	17.9539	12.6264	0.262839	4.79175	11.019	1.9814	0.151638	100	0.386808	19.2671	27.7542	-52.1402	-12.1496	19.3441		0.386808	19.2671	27.7542	-52.1402	-12.1496	19.3441
BL(1991)	571	Meta-tholeiitic basaltic andesite (L.Greenschist) (Arc)	51.39	1.55	15.82	12.23	0.26	4.42	8.95	3.3	0.37	0.3			98.59	52.2841	1.57697	16.0952	12.4428	0.264523	4.4969	9.10571	3.35741	0.376437	100	4.93016	6.91997	25.8966	-55.0852	-27.4036	102.224		4.93016	6.91997	25.8966	-55.0852	-27.4036	102.224
R(1991)	ABA	Meta-"alkalic" basalt (Amphibolite)##	49.04	1.27	16.37	9.17762	0.18	7.45	10.81	3.42	0.44	0.16	0.04		98.3576	49.9605	1.29384	16.6773	9.34988	0.183379	7.58983	11.0129	3.48419	0.448259	100	0.266885	10.7864	-5.39745	-24.1931	-12.1983	109.861		0.266885	10.7864	-5.39745	-24.1931	-12.1983	109.861
R(1991)	IAT	Meta-island arc tholeiite (basaltic andesite) (Amphibolite)	51.69	1	16.31	8.69976	0.11	7.51	8.9	3.09	0.26	0.1	0.05		97.7198	52.9775	1.02491	16.7162	8.91645	0.11274	7.69706	9.12168	3.16696	0.266476	100	6.32181	11.0454	-9.78288	-23.1222	-27.2763	90.7533		6.32181	11.0454	-9.78288	-23.1222	-27.2763	90.7533
W(1996)	AAT5	Synthetic basaltic Archaean tholeiite (similar to MORB)	49.2	1.35	13.8	14.8	0.18	6.19	12.1	2.1	0.29				100.01	49.1951	1.34987	13.7986	14.7985	0.179982	6.18938	12.0988	2.09979	0.289971	100	-1.26918	-8.3363	49.7322	-38.1808	-3.54088	26.475		-1.26918	-8.3363	49.7322	-38.1808	-3.54088	26.475
W(1996)	AAT3	Synthetic basaltic Archaean tholeiite (similar to MORB)	49.1	1.25	15.7	13.7	0.18	6.86	10.6	2.4	0.3				100.09	49.0558	1.24888	15.6859	13.6877	0.179838	6.85383	10.5905	2.39784	0.29973	100	-1.54861	4.20071	38.4927	-31.5443	-15.5662	44.4273		-1.54861	4.20071	38.4927	-31.5443	-15.5662	44.4273
W(1996)	AAT1	Synthetic basaltic Archaean tholeiite (similar to MORB)	49.8	1.03	16.4	12.7	0.13	7.09	9.88	2.67	0.26				99.96	49.8199	1.03041	16.4066	12.7051	0.130052	7.09284	9.88395	2.67107	0.260104	100	-0.0151598	8.98816	28.5507	-29.1571	-21.1989	60.8844		-0.0151598	8.98816	28.5507	-29.1571	-21.1989	60.8844
W(1996)	AAT3/2	Synthetic basaltic Archaean tholeiite (similar to MORB)	48.5	1.14	16.6	13.4	0.09	7.42	10.5	2.23	0.17				100.05	48.4758	1.13943	16.5917	13.3933	0.089955	7.41629	10.4948	2.22889	0.169915	100	-2.7128	10.218	35.5142	-25.9264	-16.3293	34.2507		-2.7128	10.218	35.5142	-25.9264	-16.3293	34.2507
PDB(1995)	SQA	Synthetic amphibolite (Meta-tholeiitic andesite)	60.7	2.1	9.5	9.1	0.3	6.9	7.8	2.1	0.4			0.1	99	61.3751	2.12336	9.60566	9.20121	0.303337	6.97674	7.88675	2.12336	0.404449	100	23.1753	-36.19	-6.90164	-30.3166	-37.1219	27.8945		23.1753	-36.19	-6.90164	-30.3166	-37.1219	27.8945
PDB(1995)	SQA	Synthetic amphibolite (Meta-tholeiitic andesite)	60.4	1.7	11.3	7.9	0.2	6.7	7.6	1.9	0.7			0.1	98.5	61.3821	1.72764	11.4837	8.02846	0.203252	6.80894	7.72358	1.93089	0.711382	100	23.1893	-23.714	-18.7677	-31.9926	-38.4228	16.302		23.1893	-23.714	-18.7677	-31.9926	-38.4228	16.302
LC(2001)	N/A	Meta-tholeiitic basalt (Amphibolite) (MORB)	49.14	1.61	16	9.84381	0.22	7.17	10.7	3.29	0.09				98.0638	50.1102	1.64179	16.3159	10.0382	0.224344	7.31157	10.9113	3.35496	0.091777	100	0.567451	8.38593	1.56673	-26.9724	-13.0086	102.077		0.567451	8.38593	1.56673	-26.9724	-13.0086	102.077
SS(1997)	S6	Meta-tholeiitic basalt (Granulite)	45.97	1.58	14.81	12.9181	0.21	8.11	13.16	2.1	0.1	0.35			99.3081	46.454	1.59663	14.9659	13.0541	0.212211	8.19538	13.2986	2.12211	0.101053	100	-6.77035	-0.581949	32.0825	-18.1449	6.02438	27.8193		-6.77035	-0.581949	32.0825	-18.1449	6.02438	27.8193
SS(1997)	S35	Meta-tholeiitic basalt (Granulite)	46.92	2.02	14.37	13.8181	0.17	7.32	12.14	1.8	0.17	0.24			98.9681	47.5244	2.04602	14.5551	13.9961	0.17219	7.4143	12.2964	1.82319	0.17219	100	-4.62202	-3.3109	41.6138	-25.9463	-1.96546	9.81468		-4.62202	-3.3109	41.6138	-25.9463	-1.96546	9.81468
SS(1997)	S37	Meta-tholeiitic basalt (Granulite)	48.79	0.54	17.13	8.03383	0.22	10.86	11.66	1.54	0.05	0.12			98.9438	49.3707	0.546427	17.3339	8.12944	0.222618	10.9893	11.7988	1.55833	0.0505951	100	-0.916758	15.1483	-17.7459	9.76011	-5.93279	-6.13842		-0.916758	15.1483	-17.7459	9.76011	-5.93279	-6.13842
SPD(1995)	AGS11.1	Garnet bearing amphibolite	54.6	0.93	13.7	12.2	0.2	5.3	10	1.1	0.6	0.1			98.73	55.3584	0.942918	13.8903	12.3695	0.202778	5.37362	10.1389	1.11528	0.608334	100	11.1002	-7.7273	25.1549	-46.3286	-19.1663	-32.8243		11.1002	-7.7273	25.1549	-46.3286	-19.1663	-32.8243
SPD(2002)	Verpenesset	Zoisite-bearing eclogite	49.96	0.76	19.97	5.8296	0.11	8.15	12.72	2.57	0.14				100.21	49.8555	0.75841	19.9282	5.81741	0.10977	8.13295	12.6934	2.56462	0.139707	100	0.0562364	32.3825	-41.1392	-18.7685	1.19968	54.473		0.0562364	32.3825	-41.1392	-18.7685	1.19968	54.473
Z(2013)	Amphibolite	Synthetic amphibolite	47.48	1.11	16.38	11.16	0.18	7.33	11.77	2.46	0.41				98.28	48.3109	1.12943	16.6667	11.3553	0.18315	7.45828	11.976	2.50305	0.417175	100	-3.04357	10.716	14.8936	-25.507	-4.51994	50.7644		-3.04357	10.716	14.8936	-25.507	-4.51994	50.7644
Z(2014)	MAOC 11	Synthetic Archaean Oceanic Crust	48.5	0.72	16.65	8.13		11	12.78	1.71					99.49	48.7486	0.723691	16.7354	8.17168		11.0564	12.8455	1.71877		100	-2.1652	11.1723	-17.3186	10.4307	2.41246	3.52506		-2.1652	11.1723	-17.3186	10.4307	2.41246	3.52506
Z(2014)	MAOC 13	Synthetic Archaean Oceanic Crust	48.14	0.69	15.81	8.12		13	12.14	1.63					99.53	48.3673	0.693258	15.8847	8.15834		13.0614	12.1973	1.6377		100	-2.93042	5.52116	-17.4534	30.4565	-2.75528	-1.35787		-2.93042	5.52116	-17.4534	30.4565	-2.75528	-1.35787
Z(2014)	MAOC 15	Synthetic Archaean Oceanic Crust	47.78	0.65	14.97	8.11		15	11.5	1.54					99.55	47.996	0.652938	15.0377	8.14666		15.0678	11.552	1.54696		100	-3.67568	-0.105348	-17.5717	50.4965	-7.90036	-6.8231		-3.67568	-0.105348	-17.5717	50.4965	-7.90036	-6.8231
*References include:
Fitton and Godard (2004): FG(2004)		Rapp and Watson (1995): RW(1995)	Sen and Dunn (1994): SD(1994)					Wolf and Wyllie (1994): WW(1994)																		More than 5% difference								More than 10% difference
Adam et al. (2012): A(2012)		Laurie and Stevens (2012): LS(2012)	Beard and Lofgren (1991): BL(1991)					Rushmer (1991): R(1991)																		Less than 5% difference								Less than 10% difference
Winther (1996): W(1996)		Patiño Douce and Beard (1995): PDB(1995)	López and Castro (2001): LC(2001)					Springer and Seck (1997): SS(1997)
Skjerlie and Patiño Douce (1995): SPD(1995)		Skjerlie and Patiño Douce (2002): SPD(2002)	Zhang et al. (2013): Z(2013)					Ziaja et al. (2014): Z(2014)
**Rock type and suite defined using the K2O-SiO2 diagram from Peccerillo and Taylor (1976).
#Same sample is used in Rapp et al. (1999; 2003), but is later designated as AB-1. Note that RW(1995) hints that the sample is N-MORB-like, but Rapp et al. (2003) says that it is derived from a back-arc basin
##Alkalic definition taken from Rushmer (1991), but if the K2O-SiO2 diagram is used the sample is transitional between tholeiitic and calcalkaline
^Many studies in the literature do not present data for P, F or Cr and therefore we normalise data to 100% totals without these elements so that all of the experimentally derived starting compositions can be compared to one another.

## Sheet: Table DR2 Experiment conditions
Experimental conditions and modal proportions
						Mineral and Melt modes#
Run	Duration (hr)	Temperature (oC)	Pressure (GPa)	Water (Wt.%)*	Water (Wt.%)**	Amphibole	Clinopyroxene	Plagioclase	Quartz	Orthopyroxene	Garnet##	Staurolite	Melt	Accessory phases^
OJPgw3	24	925	1.6	2.47	2.71	35.71	43.41	3.01	0	0	0	0	17.58	0.29 Titanomagnetite
OJPgw11	24	950	1.6	1.79	2.4	29.41	40.44	7.81	0	3.72	0	0	17.69	0.93 Titanomagnetite
OJPgw5	24	900	1.8	2.25	2.6	49.51	29.51	8.07	0.06	0	0	0	12.6	0.25 Titanomagnetite
OJPgw6	24	925	1.8	2.72	2.7	42.2	37.76	4.82	0	0	0	0	13.91	1.31 Titanomagnetite
OJPgw13	24	950	1.8	2.15	2.1	10.35	45.53	6.07	0	17.11	1	0	19.96	<0.1 Titanomagnetite
OJPgw9	24	900	2	2.07	3.4	32.84	46.89	0	0.39	0	1	0.97	17.92	<0.1 Titanomagnetite
OJPgw10	24	925	2	2.16	2.3	17.96	60.17	0	0	0	5	0.29	16.57	<0.1 Titanomagnetite
OJPgwe1	48	925	2	2.16	2.2	22.47	56.15	0	0	0.38	5	0.28	15.73	<0.1 Titanomagnetite
OJPgw8	24	925	2	3.08	3.4	32.98	38.22	0	0	0	10.56	0	18.24	<0.1 Titanomagnetite
OJPgw24	24	950	2.2	2.09	2.3	27.32	41.42	0	0	0	20	1.13	10.13	<0.1 Titanomagnetite
* 1 μl (1 mg) of distilled water added to capsule and a given sample weight is added to the capsule to make the charge up to ~2-3 wt.% water. Water weight percent in this column estimated using this method.
** Water weight percent estimated using the modal proportion of amphibole and melt in the mineral mass balance.
# Mass balance represents the average values from least squares mass balance and elemental maps using the EPMA and SEM at the University of Edinburgh and Cardiff University respectively. Main minerals are small and are, apart from garnets, mostly <10 μm
## Garnet mineral abundances (apart from OJPgw8) estimated from SEM images.
^Accessory phases are far too small to analyse (< 1 μm), but their presence can be seen using elemental maps on the EPMA at the University of Edinburgh and SEM at Cardiff University. Note that no evidence was found for the presence of rutile.

## Sheet: Table DR3 Major elements (ME)
EMPA major element data for tonalitic melts in this study															Major element data normalised to 100%															Normative Classification			Standard Deviation (3 sigma and wt% element)														Detection limits (ppm)
Sample	Point	SiO2	TiO2	Al2O3	FeO	MnO	MgO	CaO	Na2O	K2O	Cl	P2O5	SO2	Total	Sample	Point	SiO2	TiO2	Al2O3	FeO	MnO	MgO	CaO	Na2O	K2O	Cl	P2O5	SO2	Total	Orthoclase	Albite	Anorthite	Sample	Point	Si	Ti	Al	Fe	Mn	Mg	Ca	Na	K	Cl	P	S	Sample	Point	Si
OJPgw3	3 / 1 .	61.257	0.25011	15.6969	2.43107	0.0700309	1.5907	5.11226	3.44152	0.34015	0.100044	0.25011	0.0500221	90.59	OJPgw3	3 / 1 .	67.6201	0.276091	17.3274	2.6836	0.0773054	1.75594	5.64329	3.79901	0.375483	0.110436	0.276091	0.0552181	100	3.70051	53.1251	43.1744	OJPgw3	3 / 1 .	0.62	0.01	0.32	0.26	0.01	0.08	0.18	0.19	0.07	0.01	0.01	0.01	OJPgw3	3 / 1 .	1324
OJPgw3	5 / 1 .	61.5902	0.250082	16.1553	2.28075	0.070023	1.71056	5.20171	3.3411	0.320105	0.0900296	0.240079	0.0500164	91.3	OJPgw3	5 / 1 .	67.4592	0.273913	17.6948	2.49808	0.0766955	1.87356	5.69738	3.65947	0.350608	0.0986085	0.262956	0.0547825	100	3.46162	51.9725	44.5658	OJPgw3	5 / 1 .	0.62	0.01	0.33	0.25	0.01	0.08	0.19	0.18	0.07	0.01	0.01	0.01	OJPgw3	5 / 1 .	1286
OJPgw3	6 / 1 .	61.6903	0.240079	15.9653	2.32076	0.0700231	1.69056	5.03166	3.3411	0.360119	0.0900297	0.250082	0.0400132	91.09	OJPgw3	6 / 1 .	67.7246	0.263562	17.5269	2.54777	0.0768724	1.85592	5.52383	3.66791	0.395344	0.0988359	0.274544	0.0439271	100	4.00051	52.5555	43.4439	OJPgw3	6 / 1 .	0.62	0.01	0.33	0.25	0.01	0.08	0.18	0.18	0.06	0.01	0.01	0.01	OJPgw3	6 / 1 .	1346
OJPgw3	7 / 1 .	62.2271	0.250109	16.2171	2.14093	0.0700305	1.62071	5.23228	3.38147	0.310135	0.0900392	0.250109	0.0500218	91.84	OJPgw3	7 / 1 .	67.756	0.272331	17.658	2.33115	0.0762527	1.76471	5.69717	3.68192	0.337691	0.0980392	0.272331	0.0544662	100	3.36019	52.2166	44.4232	OJPgw3	7 / 1 .	0.62	0.01	0.33	0.25	0.01	0.08	0.19	0.18	0.06	0.01	0.01	0.01	OJPgw3	7 / 1 .	1270
OJPgw3	8 / 1 .	61.3803	0.250083	16.0853	2.27075	0.0700232	1.62054	5.09168	3.23107	0.330109	0.0900298	0.250083	0.0400132	90.71	OJPgw3	8 / 1 .	67.6665	0.275695	17.7327	2.50331	0.0771945	1.7865	5.61315	3.56198	0.363917	0.0992501	0.275695	0.0441112	100	3.64371	51.7376	44.6186	OJPgw3	8 / 1 .	0.64	0.01	0.34	0.27	0.01	0.08	0.19	0.19	0.07	0.01	0.01	0.01	OJPgw3	8 / 1 .	1405
OJPgw3	9 / 1 .	61.61	0.25	16.52	2.29	0.07	1.66	5.21	3.38	0.35	0.08	0.25	0.06	91.73	OJPgw3	9 / 1 .	67.1645	0.272539	18.0094	2.49646	0.0763109	1.80966	5.67971	3.68473	0.381555	0.0872125	0.272539	0.0654094	100	3.74692	52.0971	44.156	OJPgw3	9 / 1 .	0.62	0.01	0.33	0.25	0.01	0.08	0.18	0.18	0.06	0.01	0.01	0.01	OJPgw3	9 / 1 .	1358
OJPgw3	10 / 1 .	61.63	0.24	15.98	2.26	0.07	1.75	5.06	3.3	0.34	0.09	0.26	0.05	91.03	OJPgw3	10 / 1 .	67.703	0.263649	17.5547	2.4827	0.0768977	1.92244	5.55861	3.62518	0.373503	0.0988685	0.28562	0.0549269	100	3.72874	52.3798	43.8914	OJPgw3	10 / 1 .	0.62	0.01	0.33	0.25	0.01	0.08	0.18	0.18	0.06	0.01	0.01	0.01	OJPgw3	10 / 1 .	1339
OJPgw3	11 / 1 .	62.2168	0.240026	16.1118	2.26025	0.0600065	1.69018	5.13056	3.41037	0.37004	0.0800087	0.260028	0.0500054	91.88	OJPgw3	11 / 1 .	67.7152	0.261239	17.5356	2.46	0.0653097	1.83956	5.58398	3.71177	0.402743	0.0870796	0.283009	0.0544247	100	3.95662	52.6872	43.3562	OJPgw3	11 / 1 .	0.62	0.01	0.33	0.26	0.01	0.08	0.18	0.18	0.07	0.01	0.01	0.01	OJPgw3	11 / 1 .	1310
OJPgw3	12 / 1 .	62.207	0.240104	16.087	2.32101	0.0700304	1.66072	5.23227	3.47151	0.360157	0.0700304	0.260113	0.0400174	92.02	OJPgw3	12 / 1 .	67.6017	0.260926	17.4821	2.52229	0.0761035	1.80474	5.68602	3.77256	0.391389	0.0761035	0.28267	0.0434877	100	3.79766	52.7036	43.4988	OJPgw3	12 / 1 .	0.62	0.01	0.33	0.25	0.01	0.08	0.19	0.19	0.07	0.01	0.01	0.01	OJPgw3	12 / 1 .	1354
OJPgw5	46 / 1 .	66.0544	0.130028	14.6532	1.34029	0.0600131	1.05023	4.1109	3.48076	0.500109	0.0500109			91.43	OJPgw5	46 / 1 .	72.2459	0.142216	16.0267	1.46592	0.0656383	1.14867	4.49623	3.80702	0.546986	0.0546986			100	5.62201	55.7636	38.6144	OJPgw5	46 / 1 .	0.64	0.01	0.32	0.21	0.02	0.07	0.17	0.19	0.08	0.01			OJPgw5	46 / 1 .	1450
OJPgw5	47 / 1 .	65.96	0.13	14.73	1.23	0.06	1.04	3.88	3.47	0.5	0.06			91.06	OJPgw5	47 / 1 .	72.4358	0.142763	16.1761	1.35076	0.0658906	1.1421	4.26093	3.81067	0.549089	0.0658906			100	5.74022	56.9361	37.3236	OJPgw5	47 / 1 .	0.64	0.01	0.32	0.21	0.02	0.07	0.17	0.19	0.08	0.01			OJPgw5	47 / 1 .	1406
OJPgw5	48 / 1 .	65.8589	0.130057	14.5864	1.29057	0.0400176	1.09048	4.05178	3.52155	0.520228	0.050022			91.14	OJPgw5	48 / 1 .	72.2613	0.1427	16.0044	1.41603	0.0439078	1.19649	4.44566	3.86389	0.570801	0.0548847			100	5.78861	56.274	37.9374	OJPgw5	48 / 1 .	0.64	0.01	0.32	0.21	0.02	0.07	0.17	0.19	0.08	0.01			OJPgw5	48 / 1 .	1419
OJPgw5	9 / 1 .	65.7644	0.140031	15.0133	1.3803	0.0700153	1.11024	4.19092	3.1807	0.520114	0.0800175			91.45	OJPgw5	9 / 1 .	71.9129	0.153123	16.4169	1.50935	0.0765613	1.21404	4.58274	3.47807	0.568741	0.0874986			100	6.05994	52.9749	40.9652	OJPgw5	9 / 1 .	0.64	0.01	0.32	0.22	0.02	0.07	0.17	0.18	0.08	0.01			OJPgw5	9 / 1 .	1365
OJPgw6	2 / 1 .	64.7729	0.169981	14.6384	1.53983	0.0599934	1.31986	4.94946	3.17965	0.509944	0.189979			91.33	OJPgw6	2 / 1 .	70.9218	0.186118	16.028	1.68601	0.0656886	1.44515	5.41931	3.4815	0.558353	0.208014			100	5.57682	49.7647	44.6585	OJPgw6	2 / 1 .	0.61	0.01	0.31	0.21	0.02	0.07	0.18	0.18	0.08	0.01			OJPgw6	2 / 1 .	1430
OJPgw6	3 / 1 .	67.21	0.14	13.77	1.52	0.07	1.18	4.6	2.96	0.42	0.17			92.04	OJPgw6	3 / 1 .	73.0226	0.152108	14.9609	1.65146	0.0760539	1.28205	4.99783	3.21599	0.456323	0.184702			100	4.95886	49.7023	45.3388	OJPgw6	3 / 1 .	0.62	0.01	0.3	0.21	0.02	0.07	0.18	0.17	0.07	0.01			OJPgw6	3 / 1 .	1415
OJPgw6	42 / 1 .	63.947	0.190021	14.6816	1.69019	0.0700077	1.54017	5.40059	2.7003	0.350039	0.27003			90.84	OJPgw6	42 / 1 .	70.3952	0.209182	16.1621	1.86062	0.077067	1.69548	5.94517	2.97259	0.385335	0.297259			100	4.03719	44.17	51.7928	OJPgw6	42 / 1 .	0.63	0.01	0.32	0.23	0.02	0.08	0.2	0.17	0.07	0.01			OJPgw6	42 / 1 .	1411
OJPgw8	10 / 1 .	60.1339	0.430099	14.6834	2.27052		1.19027	4.39101	3.08071	0.330076	0.320074			86.83	OJPgw8	10 / 1 .	69.2547	0.495335	16.9105	2.61491		1.37081	5.05702	3.54798	0.380141	0.368621			100	3.90067	52.3242	43.7751	OJPgw8	10 / 1 .	0.61	0.01	0.32	0.26	0.02	0.07	0.18	0.18	0.07	0.01			OJPgw8	10 / 1 .	1436
OJPgw8	11 / 1 .	60.2869	0.420048	14.9417	2.16025	0.0300035	1.21014	4.24049	3.01035	0.300035	0.330038			86.93	OJPgw8	11 / 1 .	69.3511	0.483203	17.1882	2.48504	0.0345145	1.39208	4.87805	3.46295	0.345145	0.379659			100	3.70517	52.7492	43.5456	OJPgw8	11 / 1 .	0.61	0.01	0.32	0.26	0.02	0.07	0.17	0.18	0.07	0.01			OJPgw8	11 / 1 .	1384
OJPgw8	12 / 1 .	60.685	0.420243	14.7785	1.94112		0.930537	4.18241	3.03175	0.330191	0.330191			86.63	OJPgw8	12 / 1 .	70.0508	0.4851	17.0594	2.2407		1.07415	4.8279	3.49965	0.38115	0.38115			100	4.0096	53.03	42.9604	OJPgw8	12 / 1 .	0.62	0.01	0.32	0.24	0.02	0.06	0.17	0.18	0.07	0.01			OJPgw8	12 / 1 .	1399
OJPgw9	14 / 1 .	61.7283	0.235439	14.5477	2.15416	0.0459076	1.1877	4.45384	2.74425	0.459376	0.314452	0.282347		88.1535	OJPgw9	14 / 1 .	70.0237	0.267078	16.5027	2.44364	0.0520769	1.34731	5.05237	3.11304	0.521109	0.35671	0.32029		100	5.84942	50.2529	43.8977	OJPgw9	14 / 1 .	0.6254	0.0086	0.3214	0.3026	0.0187	0.0703	0.1781	0.1661	0.0741	0.0129	0.0128		OJPgw9	14 / 1 .	1373
OJPgw9	15 / 1 .	61.7041	0.208538	14.6224	1.96916	0.0584107	1.1016	4.40231	2.91324	0.537899	0.317458	0.292054		88.1272	OJPgw9	15 / 1 .	70.0171	0.236633	16.5924	2.23445	0.06628	1.25001	4.9954	3.30572	0.610366	0.360227	0.3314		100	6.62703	51.6445	41.7284	OJPgw9	15 / 1 .	0.6257	0.0084	0.3218	0.2948	0.0183	0.0672	0.179	0.1706	0.0796	0.0131	0.0131		OJPgw9	15 / 1 .	1405
OJPgw10	48 / 1 .	60.6007	0.489266	14.8726	3.21449	0.0330112	2.11192	4.90607	3.08015	0.341416	0.275594	0.134546		90.0597	OJPgw10	48 / 1 .	67.2895	0.543269	16.5141	3.56929	0.0366548	2.34502	5.44757	3.42012	0.3791	0.306012	0.149396		100	3.91391	50.5846	45.5015	OJPgw10	48 / 1 .	0.6215	0.0104	0.328	0.3649	0.0187	0.0913	0.1883	0.1779	0.0686	0.0124	0.0099		OJPgw10	48 / 1 .	1365
OJPgw11	31 / 1 .	63.5038	0.187202	15.3942	2.46313	0.0601007	1.33431	4.30875	4.04174	0.465905		0.324204		92.0833	OJPgw11	31 / 1 .	68.9634	0.203296	16.7177	2.67489	0.0652677	1.44903	4.67918	4.38923	0.50596		0.352076		100	4.93342	60.805	34.2616	OJPgw11	31 / 1 .	0.6279	0.0048	0.3301	0.3283	0.017	0.0749	0.175	0.203	0.075		0.0115		OJPgw11	31 / 1 .	1445
OJPgw11	32 / 1 .	63.9753	0.18577	15.817	2.36301	0.0626897	1.31468	4.32519	3.45603	0.48812		0.295752		92.2836	OJPgw11	32 / 1 .	69.3247	0.201303	17.1396	2.5606	0.0679316	1.42461	4.68685	3.74501	0.528935		0.320481		100	5.58904	56.6226	37.7883	OJPgw11	32 / 1 .	0.6299	0.0048	0.3348	0.3278	0.017	0.0742	0.1738	0.1887	0.0725		0.0112		OJPgw11	32 / 1 .	1429
OJPgw11	33 / 1 .	63.6291	0.19041	15.8066	2.53293	0.0632033	1.29487	4.47204	3.7114	0.519628		0.294116		92.5143	OJPgw11	33 / 1 .	68.7776	0.205817	17.0856	2.73788	0.0683174	1.39964	4.83389	4.0117	0.561673		0.317914		100	5.59852	57.4019	36.9996	OJPgw11	33 / 1 .	0.6289	0.0048	0.334	0.3318	0.0167	0.0745	0.1765	0.1955	0.0762		0.0111		OJPgw11	33 / 1 .	1437
OJPgw11	34 / 1 .	63.0393	0.194619	15.8648	2.38783	0.0530051	1.26942	4.44713	3.79066	0.51885		0.31073		91.8764	OJPgw11	34 / 1 .	68.6132	0.211827	17.2676	2.59896	0.0576917	1.38166	4.84034	4.12583	0.564726		0.338204		100	5.5114	58.1997	36.2888	OJPgw11	34 / 1 .	0.6262	0.0048	0.3354	0.3172	0.0172	0.0735	0.1759	0.1965	0.0781		0.0113		OJPgw11	34 / 1 .	1440
OJPgw11	35 / 1 .	64.2172	0.191601	15.6755	2.49532	0.0516003	1.28851	4.31583	3.65472	0.488603		0.305702		92.6846	OJPgw11	35 / 1 .	69.2857	0.206724	16.9127	2.69227	0.055673	1.39021	4.65647	3.94318	0.527168		0.32983		100	5.45343	58.048	36.4986	OJPgw11	35 / 1 .	0.6312	0.0048	0.3316	0.3301	0.0172	0.0751	0.1743	0.1924	0.076		0.0113		OJPgw11	35 / 1 .	1438
OJPgw11	36 / 1 .	63.7778	0.200868	15.3862	2.75546	0.0538914	1.37938	4.21393	3.42905	0.413634		0.304851		91.9151	OJPgw11	36 / 1 .	69.3877	0.218536	16.7396	2.99783	0.0586317	1.50071	4.58459	3.73067	0.450017		0.331666		100	4.85395	57.6087	37.5373	OJPgw11	36 / 1 .	0.6291	0.0048	0.3308	0.3399	0.0172	0.0759	0.1728	0.1878	0.0734		0.0113		OJPgw11	36 / 1 .	1435
OJPgw11	37 / 1 .	63.4566	0.194784	15.706	2.4472	0.0594951	1.36969	4.33954	3.54871	0.462762		0.322773		91.9075	OJPgw11	37 / 1 .	69.0439	0.211935	17.0889	2.66267	0.0647337	1.49029	4.72164	3.86117	0.503508		0.351194		100	5.20705	57.5581	37.2349	OJPgw11	37 / 1 .	0.6274	0.0048	0.3325	0.3319	0.0171	0.0759	0.1753	0.1912	0.0755		0.0115		OJPgw11	37 / 1 .	1400
OJPgw11	38 / 1 .	64.5664	0.195483	16.0745	2.3539	0.0647944	1.45708	4.32313	3.5196	0.501257		0.309473		93.3656	OJPgw11	38 / 1 .	69.1543	0.209374	17.2168	2.52116	0.0693986	1.56061	4.63032	3.7697	0.536876		0.331464		100	5.70821	57.0617	37.2301	OJPgw11	38 / 1 .	0.632	0.0048	0.3362	0.3194	0.0171	0.077	0.1743	0.1905	0.0764		0.0112		OJPgw11	38 / 1 .	1403
OJPgw11	13 / 1 .	63.3327	0.206203	15.5413	2.60624	0.0710012	1.34382	4.55037	3.54846	0.508608		0.351606		92.0603	OJPgw11	13 / 1 .	68.7948	0.223987	16.8816	2.83102	0.0771246	1.45972	4.94282	3.85449	0.552473		0.38193		100	5.61823	56.3111	38.0706	OJPgw11	13 / 1 .	0.6293	0.0048	0.3309	0.3353	0.0167	0.0753	0.1781	0.1925	0.0764		0.0118		OJPgw11	13 / 1 .	1441
OJPgw11	14 / 1 .	62.53	0.209312	15.4013	2.44544	0.0604036	1.39118	4.63947	3.66262	0.51393		0.34012		91.1938	OJPgw11	14 / 1 .	68.5683	0.229525	16.8886	2.68159	0.0662365	1.52552	5.08749	4.0163	0.563559		0.372964		100	5.50101	56.5428	37.9562	OJPgw11	14 / 1 .	0.625	0.0049	0.3304	0.33	0.0169	0.0773	0.1804	0.1954	0.0766		0.0118		OJPgw11	14 / 1 .	1401
OJPgw11	15 / 1 .	63.25	0.206704	15.7684	2.88455	0.0788014	1.42253	4.69849	3.63567	0.479609		0.320306		92.745	OJPgw11	15 / 1 .	68.1977	0.222873	17.0019	3.1102	0.0849657	1.5338	5.06603	3.92007	0.517126		0.345362		100	5.19891	56.1167	38.6844	OJPgw11	15 / 1 .	0.6283	0.0048	0.3338	0.3487	0.0167	0.0774	0.1808	0.1936	0.0745		0.0114		OJPgw11	15 / 1 .	1369
OJPgw11	17 / 1 .	62.9252	0.210201	15.4229	2.54671	0.0698003	1.40071	4.55402	3.43192	0.461502		0.346702		91.3696	OJPgw11	17 / 1 .	68.8688	0.230056	16.8796	2.78726	0.0763934	1.53301	4.98417	3.75608	0.505094		0.37945		100	5.28263	55.7654	38.952	OJPgw11	17 / 1 .	0.6271	0.0049	0.3296	0.336	0.0168	0.0766	0.1775	0.1892	0.0737		0.0117		OJPgw11	17 / 1 .	1439
OJPgw11	18 / 1 .	62.7915	0.211756	15.9921	2.51448	0.0673861	1.4406	4.78921	3.63185	0.513894		0.347229		92.3	OJPgw11	18 / 1 .	68.0298	0.229422	17.3262	2.72425	0.0730077	1.56078	5.18875	3.93483	0.556765		0.376196		100	5.53142	55.5825	38.8861	OJPgw11	18 / 1 .	0.6267	0.0049	0.3366	0.3281	0.0168	0.0774	0.1832	0.1938	0.0753		0.0119		OJPgw11	18 / 1 .	1391
OJPgw11	20 / 1 .	62.4605	0.208316	15.8504	2.5583	0.0625048	1.3155	4.89918	3.46807	0.480437		0.325725		91.629	OJPgw11	20 / 1 .	68.1668	0.227347	17.2985	2.79202	0.0682151	1.43568	5.34676	3.7849	0.524329		0.355483		100	5.18671	53.9855	40.8278	OJPgw11	20 / 1 .	0.6249	0.0048	0.3339	0.3334	0.0169	0.0747	0.1846	0.1899	0.074		0.0116		OJPgw11	20 / 1 .	1417
OJPgw13	53 / 1 .	61.8429	0.434966	16.0645	3.28695	0.0594954	1.37009	5.00821	3.11556	0.339274		0.237882		91.7598	OJPgw13	53 / 1 .	67.3965	0.474027	17.5071	3.58212	0.0648382	1.49313	5.45796	3.39534	0.369741		0.259244		100	3.88068	51.0601	45.0592	OJPgw13	53 / 1 .	0.6232	0.0058	0.3388	0.3702	0.0169	0.0764	0.1865	0.1808	0.0658		0.0103		OJPgw13	53 / 1 .	1414
OJPgw13	54 / 1 .	61.394	0.422316	16.8357	3.10802	0.0656025	1.38235	5.1643	3.13932	0.369314		0.237609		92.1186	OJPgw13	54 / 1 .	66.6467	0.458448	18.2762	3.37393	0.0712153	1.50062	5.60614	3.40791	0.400911		0.257938		100	4.12173	50.312	45.5663	OJPgw13	54 / 1 .	0.6209	0.0058	0.3454	0.3762	0.0166	0.0762	0.191	0.181	0.0666		0.0103		OJPgw13	54 / 1 .	1370
OJPgw13	55 / 1 .	60.6196	0.423834	16.9209	3.28556	0.0579047	1.54922	5.23512	3.14815	0.314725		0.232019		91.787	OJPgw13	55 / 1 .	66.0438	0.461758	18.4349	3.57955	0.0630859	1.68785	5.70356	3.42985	0.342887		0.252779		100	3.48364	50.3206	46.1958	OJPgw13	55 / 1 .	0.617	0.0057	0.3465	0.3671	0.0167	0.0807	0.1911	0.1821	0.0658		0.0101		OJPgw13	55 / 1 .	1376
OJPgw13	56 / 1 .	61.3315	0.42675	16.6028	3.32799	0.0729085	1.49778	5.21151	3.26088	0.324438		0.246629		92.3032	OJPgw13	56 / 1 .	66.4457	0.462335	17.9873	3.6055	0.0789881	1.62267	5.64608	3.53279	0.351492		0.267194		100	3.55366	51.3192	45.1272	OJPgw13	56 / 1 .	0.6194	0.0058	0.3434	0.3735	0.0168	0.0791	0.1894	0.1834	0.0653		0.0104		OJPgw13	56 / 1 .	1319
OJPgw13	57 / 1 .	60.6139	0.427577	16.3866	3.31002	0.0838955	1.45942	5.31271	3.01144	0.309083		0.237287		91.152	OJPgw13	57 / 1 .	66.4977	0.469081	17.9772	3.63132	0.0920391	1.60109	5.82841	3.30375	0.339086		0.26032		100	3.51536	48.8542	47.6304	OJPgw13	57 / 1 .	0.617	0.0058	0.3422	0.3754	0.0165	0.0793	0.1919	0.1774	0.0648		0.0104		OJPgw13	57 / 1 .	1394
OJPgw13	58 / 1 .	60.2241	0.42929	16.4591	3.23902	0.0682983	1.49876	5.31217	2.51074	0.315292		0.236894		90.2937	OJPgw13	58 / 1 .	66.698	0.475437	18.2284	3.58721	0.0756402	1.65988	5.88321	2.78064	0.349185		0.26236		100	3.89788	44.3304	51.7717	OJPgw13	58 / 1 .	0.6147	0.0057	0.3418	0.3725	0.0166	0.0792	0.1918	0.1625	0.0648		0.0099		OJPgw13	58 / 1 .	1356
OJPgw13	59 / 1 .	60.9159	0.426598	16.6509	3.43028	0.0610997	1.49309	5.29527	3.23688	0.322198		0.228299		92.0605	OJPgw13	59 / 1 .	66.1694	0.463388	18.0869	3.72612	0.066369	1.62186	5.75195	3.51604	0.349985		0.247988		100	3.52087	50.7015	45.7776	OJPgw13	59 / 1 .	0.6188	0.0058	0.3436	0.3755	0.0171	0.08	0.1901	0.1845	0.0644		0.0103		OJPgw13	59 / 1 .	1391
OJPgw13	60 / 1 .	61.1591	0.433548	16.3622	3.41988	0.0774085	1.49116	5.21587	3.01993	0.329836		0.213924		91.7229	OJPgw13	60 / 1 .	66.6782	0.472671	17.8387	3.72849	0.0843939	1.62573	5.68656	3.29245	0.359601		0.233228		100	3.75268	49.1057	47.1417	OJPgw13	60 / 1 .	0.62	0.0057	0.3414	0.3775	0.0166	0.078	0.19	0.1777	0.0649		0.0097		OJPgw13	60 / 1 .	1429
OJPgw13	61 / 1 .	60.7792	0.424128	16.0525	3.48803	0.060304	1.38889	5.20785	2.43426	0.328022		0.233315		90.3965	OJPgw13	61 / 1 .	67.2363	0.469186	17.7578	3.85859	0.0667106	1.53644	5.76111	2.69287	0.36287		0.258102		100	4.10976	43.9706	51.9196	OJPgw13	61 / 1 .	0.618	0.0056	0.3368	0.3782	0.0165	0.0772	0.1904	0.1623	0.0658		0.0101		OJPgw13	61 / 1 .	1431
OJPgwe1	60 / 1 .	61.9631	0.322495	15.2806	2.52576	0.0532992	1.26518	4.68703	3.27195	0.415994	0.286596	0.201597		90.2736	OJPgwe1	60 / 1 .	68.6392	0.357242	16.927	2.7979	0.0590419	1.4015	5.19203	3.62448	0.460815	0.317475	0.223318		100	4.69273	53.1699	42.1374	OJPgwe1	60 / 1 .	0.6231	0.0075	0.3277	0.2656	0.0161	0.0734	0.1814	0.1833	0.0714	0.0125	0.0112		OJPgwe1	60 / 1 .	1391
OJPgwe1	61 / 1 .	62.1742	0.322479	15.3079	2.53294	0.0276982	1.24922	4.72919	3.35858	0.370976	0.30488	0.200787		90.5788	OJPgwe1	61 / 1 .	68.641	0.35602	16.9001	2.79639	0.0305791	1.37915	5.22108	3.70791	0.409561	0.336591	0.221671		100	4.14471	53.8455	42.0097	OJPgwe1	61 / 1 .	0.6267	0.0074	0.3294	0.2786	0.0164	0.0736	0.1837	0.1877	0.0706	0.0127	0.0112		OJPgwe1	61 / 1 .	1433
OJPgwe1	62 / 1 .	62.3417	0.327693	15.4867	2.58535	0.0564988	1.22397	4.53231	3.32913	0.415491	0.295094	0.192696		90.7866	OJPgwe1	62 / 1 .	68.6684	0.360949	17.0583	2.84772	0.0622326	1.34819	4.99226	3.66698	0.457657	0.325041	0.212252		100	4.74088	54.3058	40.9533	OJPgwe1	62 / 1 .	0.6268	0.0076	0.3311	0.2735	0.016	0.074	0.1797	0.1861	0.0734	0.0126	0.0112		OJPgwe1	62 / 1 .	1449
OJPgwe1	63 / 1 .	62.9269	0.326088	15.8062	2.62651	0.0506137	1.24474	4.61255	3.3327	0.433217	0.284377	0.218359		91.8622	OJPgwe1	63 / 1 .	68.5014	0.354975	17.2064	2.85918	0.0550974	1.355	5.02116	3.62793	0.471594	0.309569	0.237703		100	4.87169	54.0231	41.1052	OJPgwe1	63 / 1 .	0.6283	0.0075	0.333	0.2735	0.0165	0.0738	0.18	0.1865	0.0739	0.0125	0.0114		OJPgwe1	63 / 1 .	1434
OJPgwe1	64 / 1 .	62.514	0.325027	15.4232	2.60462	0.0454038	1.1993	4.63449	3.36648	0.441337	0.287224	0.204717		91.0458	OJPgwe1	64 / 1 .	68.6621	0.356993	16.9401	2.86078	0.0498692	1.31725	5.09029	3.69757	0.484742	0.315472	0.224851		100	4.98087	53.9983	41.0208	OJPgwe1	64 / 1 .	0.6264	0.0076	0.3284	0.2722	0.016	0.0711	0.1808	0.1876	0.0714	0.0124	0.0113		OJPgwe1	64 / 1 .	1407
OJPgwe1	65 / 1 .	63.1962	0.330724	15.3435	2.29706	0.0385144	1.22466	4.54811	3.33595	0.383844	0.283406	0.190471		91.1724	OJPgwe1	65 / 1 .	69.3151	0.362746	16.8291	2.51947	0.0422435	1.34323	4.98847	3.65895	0.421009	0.310847	0.208913		100	4.35679	54.5105	41.1327	OJPgwe1	65 / 1 .	0.628	0.0076	0.3284	0.2599	0.0161	0.0725	0.1791	0.1875	0.0725	0.0123	0.0108		OJPgwe1	65 / 1 .	1356
OJPgwe1	66 / 1 .	62.6312	0.327728	15.7815	2.65042	0.047804	1.2096	4.67379	3.41069	0.421135	0.289824	0.201917		91.6456	OJPgwe1	66 / 1 .	68.3406	0.357603	17.2202	2.89203	0.0521618	1.31987	5.09985	3.7216	0.459526	0.316245	0.220324		100	4.66734	54.1898	41.1429	OJPgwe1	66 / 1 .	0.6263	0.0076	0.3326	0.2764	0.0162	0.073	0.181	0.189	0.0716	0.0125	0.0115		OJPgwe1	66 / 1 .	1386
OJPgwe1	67 / 1 .	63.2644	0.345215	15.7628	2.68382	0.0522023	1.26145	4.7231	3.46875	0.414618	0.298513	0.211609		92.4865	OJPgwe1	67 / 1 .	68.404	0.37326	17.0433	2.90185	0.0564431	1.36393	5.1068	3.75055	0.448301	0.322764	0.2288		100	4.55575	54.5045	40.9397	OJPgwe1	67 / 1 .	0.6295	0.0076	0.3335	0.2717	0.0159	0.0735	0.1809	0.1884	0.0723	0.0127	0.0113		OJPgwe1	67 / 1 .	1411
OJPgwe1	68 / 1 .	62.3222	0.346059	15.7086	2.60704	0.0436074	1.22211	4.7269	3.47829	0.35306	0.288949	0.205535		91.3023	OJPgwe1	68 / 1 .	68.2592	0.379025	17.205	2.8554	0.0477616	1.33853	5.1772	3.80964	0.386693	0.316475	0.225115		100	3.91476	54.9036	41.1816	OJPgwe1	68 / 1 .	0.624	0.0077	0.3319	0.275	0.0162	0.0737	0.1817	0.1894	0.0676	0.0127	0.0113		OJPgwe1	68 / 1 .	1341
OJPgwe1	69 / 1 .	63.1936	0.329031	15.8951	2.46373	0.0345033	1.22462	4.63984	3.32141	0.438441	0.287827	0.225821		92.0539	OJPgwe1	69 / 1 .	68.6484	0.357433	17.2672	2.6764	0.0374816	1.33032	5.04035	3.60812	0.476288	0.312672	0.245314		100	4.982	53.7982	41.2198	OJPgwe1	69 / 1 .	0.6281	0.0076	0.3329	0.2656	0.0161	0.0729	0.1812	0.187	0.0719	0.0124	0.0116		OJPgwe1	69 / 1 .	1402
OJPgwe1	70 / 1 .	62.5073	0.34302	15.1748	2.58955	0.0438026	1.24987	4.66598	3.56861	0.410724	0.292417	0.222113		91.0682	OJPgwe1	70 / 1 .	68.6379	0.376663	16.6631	2.84353	0.0480987	1.37246	5.12361	3.91861	0.451007	0.321097	0.243898		100	4.44367	55.5672	39.9891	OJPgwe1	70 / 1 .	0.6268	0.0076	0.3278	0.2759	0.0161	0.0735	0.1823	0.1921	0.0698	0.0126	0.0116		OJPgwe1	70 / 1 .	1418
OJPgwe1	71 / 1 .	62.2027	0.33974	15.4548	2.50773	0.0485199	1.26062	4.67442	3.37729	0.410469	0.298323	0.203284		90.7778	OJPgwe1	71 / 1 .	68.5219	0.374254	17.0248	2.76249	0.0534491	1.38869	5.1493	3.72039	0.452169	0.328629	0.223935		100	4.55111	54.0146	41.4343	OJPgwe1	71 / 1 .	0.6261	0.0076	0.3303	0.2701	0.0165	0.0739	0.1799	0.1892	0.0687	0.0126	0.0113		OJPgwe1	71 / 1 .	1439
OJPgw24	33 / 1 .	61.3763	0.589909	14.5634	2.2896	0.0195102	1.17702	4.24722	2.97526	0.382901	0.468145	0.130268		88.2196	OJPgw24	33 / 1 .	69.5722	0.668682	16.5082	2.59534	0.0221155	1.33419	4.81438	3.37256	0.434031	0.530659	0.147664		100	4.78718	52.8109	42.4019	OJPgw24	33 / 1 .	0.6195	0.0109	0.3216	0.2659	0.0119	0.0715	0.1729	0.1781	0.0716	0.0152	0.0099		OJPgw24	33 / 1 .	1432
OJPgw24	34 / 1 .	61.1483	0.611344	14.5435	2.53761		1.2493	4.16206	2.84594	0.437675	0.453781	0.132853		88.1224	OJPgw24	34 / 1 .	69.3902	0.693744	16.5038	2.87965		1.41769	4.72305	3.22953	0.496667	0.514944	0.15076		100	5.5709	51.8485	42.5806	OJPgw24	34 / 1 .	0.6177	0.0111	0.3219	0.2783	0.0119	0.0731	0.1712	0.1739	0.0734	0.0151	0.0102		OJPgw24	34 / 1 .	1321
OJPgw24	10 / 1 .	62.7962	0.360651	14.1789	1.85546	0.0317045	1.03775	3.5105	3.42749	0.453465	0.456465	0.228433		88.337	OJPgw24	10 / 1 .	71.087	0.408268	16.0509	2.10044	0.0358904	1.17476	3.97399	3.88002	0.513335	0.516732	0.258592		100	5.67295	60.921	33.406	OJPgw24	10 / 1 .	0.6252	0.0095	0.3163	0.2402	0.0119	0.0676	0.1587	0.1904	0.0755	0.0152	0.0119		OJPgw24	10 / 1 .	1335
OJPgw24	11 / 1 .	62.9292	0.358337	14.3598	2.22085	0.0232088	1.32911	3.74253	3.39339	0.49929	0.432465	0.225286		89.5134	OJPgw24	11 / 1 .	70.3014	0.400316	16.042	2.48102	0.0259278	1.48481	4.18097	3.79093	0.557783	0.483129	0.251678		100	6.04439	58.8825	35.0731	OJPgw24	11 / 1 .	0.6239	0.0094	0.3189	0.2529	0.0117	0.0738	0.1637	0.1882	0.0779	0.0148	0.0117		OJPgw24	11 / 1 .	1321
OJPgw24	12 / 1 .	63.1686	0.36772	14.689	2.16811		1.24571	3.56447	3.43863	0.459651	0.45675	0.210169		89.7688	OJPgw24	12 / 1 .	70.3681	0.409631	16.3632	2.41522		1.38768	3.97072	3.83054	0.512038	0.508807	0.234122		100	5.6002	60.5328	33.867	OJPgw24	12 / 1 .	0.627	0.0095	0.322	0.2513	0.0117	0.0737	0.1597	0.189	0.0737	0.0151	0.0116		OJPgw24	12 / 1 .	1428
OJPgw24	13 / 1 .	62.2518	0.371267	14.007	1.93517	0.0257115	1.31869	3.74388	3.49927	0.420089	0.439397	0.201991		88.2143	OJPgw24	13 / 1 .	70.5689	0.420869	15.8784	2.19371	0.0291467	1.49487	4.24407	3.96678	0.476214	0.498102	0.228977		100	5.04022	59.9899	34.9699	OJPgw24	13 / 1 .	0.6217	0.0096	0.3152	0.2441	0.0119	0.0745	0.1636	0.1895	0.0732	0.0148	0.0114		OJPgw24	13 / 1 .	1385
OJPgw24	14 / 1 .	60.5119	0.593797	15.0851	2.37639	0.027914	1.18579	4.191	2.90635	0.345373	0.518159	0.151176		87.8929	OJPgw24	14 / 1 .	68.8473	0.675592	17.163	2.70373	0.0317591	1.34913	4.7683	3.3067	0.392947	0.589535	0.172		100	4.4397	52.9218	42.6385	OJPgw24	14 / 1 .	0.614	0.0107	0.3262	0.2653	0.0116	0.0716	0.1714	0.1764	0.0664	0.0156	0.0103		OJPgw24	14 / 1 .	1388
OJPgw24	15 / 1 .	61.4635	0.565294	14.4568	2.18944		1.23484	4.2309	3.10962	0.406011	0.517869	0.143675		88.318	OJPgw24	15 / 1 .	69.5935	0.640066	16.369	2.47904		1.39818	4.79053	3.52093	0.459715	0.586369	0.162679		100	4.89458	53.9334	41.172	OJPgw24	15 / 1 .	0.6171	0.0108	0.3188	0.2591	0.0117	0.0724	0.1716	0.1802	0.0686	0.016	0.0103		OJPgw24	15 / 1 .	1332
OJPgw24	16 / 1 .	62.0591	0.577387	14.3481	2.21302	0.0249081	1.31052	4.26248	2.98717	0.398129	0.454147	0.140746		88.7757	OJPgw24	16 / 1 .	69.9055	0.650388	16.1622	2.49282	0.0280573	1.47622	4.8014	3.36485	0.448466	0.511567	0.158541		100	4.90867	52.7916	42.2997	OJPgw24	16 / 1 .	0.6055	0.0108	0.3092	0.2559	0.0118	0.0729	0.1677	0.1725	0.0698	0.0151	0.0098		OJPgw24	16 / 1 .	1368
[truncated: 11 more columns]

## Sheet: Table DR4 ME comparison
Average Ontong Java Plateau-derived tonalite compositions and liquids from the literature																			Normalised Data (Removed Cl, P and S)**											Eoarchaean TTG from Nutmann et al. (2006) and Hoffmann et al. (2011)													Comparing Experimental melts to published Eoarchaean TTG from Nutmann et al. (2006) and Hoffmann et al. (2011)
*References include:
Wolf and Wyllie (1994): WW(1994)			Sen and Dunn (1994): SD(1994)			Rapp and Watson (1995): RW(1995)					Rushmer (1991): R(1991)				Beard and Lofgren (1991): BL(1991)				**Many studies in the literature do not present data for Cl, P or S and therefore we normalise																									This study
Laurie and Stevens (2012): LS(2012)			Springer and Seck (1997): SS(1997)			Patiño Douce and Beard (1995): PDB(1995)					López and Castro (2001): LC(2001)				Winther (1996): W(1996)				data to 100% totals without these elements so that all of the experimentally derived melts can
Adam et al. (2012): A(2012)			Skjerlie and Patiño Douce (1995): SPD(1995)			Skjerlie and Patiño Douce (2002): SPD(2002)					Zhang et al. (2013): Z(2013)				Ziaja et al. (2014): Z(2014)				be compared to one another.
Reference	Sample	Temperature (oC)	Pressure (GPa)	Water added (wt.%)	SiO2	TiO2	Al2O3	FeO(t)	MnO	MgO	CaO	Na2O	K2O	Cl	P2O5	SO2	Wet total	Total	SiO2	TiO2	Al2O3	FeO(t)	MnO	MgO	CaO	Na2O	K2O	Total		Sample	Age (Ma)	SiO2	TiO2	Al2O3	FeOt	MgO	MnO	CaO	Na2O	K2O	Total
This study	OJPgw3	925	1.6	2.5	67.6012	0.268883	17.6135	2.50282	0.075438	1.82367	5.63146	3.68495	0.374693	0.0949371	0.276162	0.052306	91.3544	100	67.8886	0.270026	17.6884	2.51346	0.0757588	1.83142	5.6554	3.70061	0.376286	100		SG05	3793	65.0243	0.502506	18.1907	3.23743	1.53767	0.0502506	4.68336	5.11551	1.65827	100
This study	OJPgw11	950	1.6	1.8	68.7983	0.216573	17.0318	2.7409	0.0681135	1.47466	4.87495	3.91737	0.528443		0.348872		92.1377	100	69.0392	0.217331	17.0914	2.7505	0.0683519	1.47983	4.89202	3.93108	0.530293	100		Tonalite - G93/05	3.842	67.9195	0.411633	16.0939	3.39672	2.39952	0.060239	4.54804	3.71474	1.45578	100
This study	OJPgw5	900	1.8	2.3	72.214	0.145201	16.156	1.43551	0.0629995	1.17533	4.44639	3.73991	0.558904	0.0657432			91.27	100	72.2615	0.145296	16.1667	1.43646	0.063041	1.1761	4.44931	3.74237	0.559272	100		Tonalite - 225893	3.7	70.0091	0.434462	15.9033	2.92291	1.00027	0.0404151	3.23321	4.93064	1.52567	100
This study	OJPgw6	925	1.8	2.7	71.4466	0.182469	15.717	1.73269	0.0729365	1.47423	5.4541	3.22336	0.466671	0.229992			91.4033	100	71.6113	0.18289	15.7532	1.73669	0.0731047	1.47762	5.46668	3.23079	0.467746	100		Tonalite - 236999	3.7	67.3468	0.459392	14.7107	6.38619	1.08212	0.0714609	4.14473	3.81806	1.98049	100
This study	OJPgw13	950	1.8	2.2	66.6458	0.46737	18.0105	3.63031	0.0736978	1.59436	5.70277	3.26129	0.358418		0.255462		91.5105	100	66.8165	0.468567	18.0566	3.63961	0.0738866	1.59845	5.71738	3.26965	0.359336	100		Tonalite - 236991	3.7	69.1466	0.416791	15.4721	3.88402	1.18938	0.0406625	3.72062	4.69652	1.43335	100
This study	OJPgw9	900	2	2.1	70.0204	0.251856	16.5475	2.33905	0.0591785	1.29866	5.02388	3.20938	0.565738	0.358469	0.325845		88.1403	100	70.5029	0.253591	16.6616	2.35517	0.0595862	1.30761	5.0585	3.23149	0.569636	100		Tonalite - 248046A	3.65	72.5631	0.261525	15.088	1.95835	0.663871	0.0603519	2.19279	4.69739	2.51466	100
This study	OJPgw10	925	2	2.2	67.2895	0.543269	16.5141	3.56929	0.0366548	2.34502	5.44757	3.42012	0.3791	0.306012	0.149396		90.0597	100	67.5973	0.545754	16.5897	3.58562	0.0368225	2.35575	5.47249	3.43576	0.380834	100		Tonalite G93/44	3.806	70.5387	0.272	16.5719	1.76761	0.967112	0.0201482	3.59645	5.17808	1.088	100
This study	OJPgwe1	925	2	2.2	68.6033	0.36393	17.0237	2.8011	0.0495383	1.35484	5.1002	3.7094	0.44828	0.319406	0.226341		91.2545	100	68.9797	0.365927	17.1171	2.81647	0.0498101	1.36228	5.12819	3.72975	0.45074	100		Trondj - A0518	3.8	75.5628	0.0812613	14.9622	0.881579	0.162523	0.0101577	1.48302	5.80002	1.0564	100
This study	OJPgw8	925	2	3	69.5522	0.487879	17.0527	2.44688	0.0345145	1.27902	4.92099	3.50353	0.368812	0.376477			86.7967	100.023	69.7989	0.48961	17.1132	2.45556	0.0346369	1.28355	4.93845	3.51596	0.37012	100		Trondj - A0A0512	3.777	71.9005	0.285441	15.9133	2.6952	1.35584	0.030583	0.499522	5.28066	2.03886	100
This study	OJPgw24	950	2.2	2.1	69.9593	0.551951	16.3379	2.48233	0.0288161	1.39084	4.47416	3.58476	0.4768	0.526649	0.196113		88.5821	100.01	70.4618	0.555915	16.4552	2.50016	0.0290231	1.40083	4.50629	3.61051	0.480224	100		Trondj - A0405-1	3.573	73.6986	0.181648	14.9658	1.37526	0.544944	0.0201831	1.42291	5.04578	2.7449	100
WW(1994)	120	850	1		64.79	0.43	19.07	4.51	0.18	1.51	7.95	1.25	0.29					99.98	64.803	0.430086	19.0738	4.5109	0.180036	1.5103	7.95159	1.25025	0.290058	100		Trondj - A0405-2	3.573	76.8851	0.0302777	13.524	0.376418	0.232129	0.0201851	0.726664	5.06646	3.13878	100
WW(1994)	118	875	1		65.09	0.3	19.27	3.69		1.99	7.91	1.36	0.38					99.99	65.0965	0.30003	19.2719	3.69037	0	1.9902	7.91079	1.36014	0.380038	100		496430	3739	70.9786	0.311663	16.0858	2.01732	0.854559	0.0402145	2.89545	5.2681	1.54826	100
WW(1994)	102	900	1		63.97	0.35	19.21	4.64	0.12	2.06	8.54	0.9	0.32					100.11	63.8997	0.349615	19.1889	4.6349	0.119868	2.05774	8.53062	0.899011	0.319648	100		496431	3763	70.3354	0.292644	16.4486	2.02485	0.938479	0.0403647	2.67416	5.90333	1.34213	100
WW(1994)	115	900	1		63.79	0.31	20.33	4.56		1.7	8.27	0.84	0.24					100.04	63.7645	0.309876	20.3219	4.55818	0	1.69932	8.26669	0.839664	0.239904	100		499337	3698	69.4386	0.397666	16.0086	3.18368	1.27457	0.0407862	3.97666	4.30295	1.37654	100
WW(1994)	106	900	1		66.34	0.33	18.95	3.99	0.05	1.36	7.5	1.13	0.4					100.05	66.3068	0.329835	18.9405	3.98801	0.049975	1.35932	7.49625	1.12944	0.3998	100		jeh-SG-01	3772	70.7427	0.334457	15.7093	2.57171	0.891885	0.0506753	3.30403	4.45942	1.9358	100
WW(1994)	108	925	1		62.47	0.42	20.93	4.93		1.33	8.53	1.13	0.28					100.02	62.4575	0.419916	20.9258	4.92901	0	1.32973	8.52829	1.12977	0.279944	100		SG04	3772	70.6161	0.341529	15.871	2.59404	0.934181	0.0502248	3.00344	5.26356	1.32593	100
WW(1994)	109	925	1		63.51	0.32	19.79	4.41	0.18	1.97	8.28	1.32	0.36					100.14	63.4212	0.319553	19.7623	4.40383	0.179748	1.96725	8.26842	1.31815	0.359497	100		SG09	3795	73.0955	0.22059	14.94	1.86758	0.491314	0.0501341	2.18585	4.69255	2.45657	100
WW(1994)	110	925	1		61.72	0.33	21.06	4.59		2.47	7.88	1.72	0.37					100.14	61.6337	0.329539	21.0306	4.58358	0	2.46655	7.86898	1.7176	0.369483	100		SG10	3787	71.6803	0.280706	15.4388	2.17399	0.741866	0.0501261	2.66671	4.63165	2.33587	100
WW(1994)	113	925	1		63.64	0.4	20.33	3.27	0.14	2.11	7.93	2	0.31					100.13	63.5574	0.399481	20.3036	3.26575	0.139818	2.10726	7.9197	1.9974	0.309598	100		jeh-2007-05	3677	70.9625	0.412105	14.876	3.61768	0.985032	0.0603081	3.19633	4.4628	1.42729	100
WW(1994)	117	950	1		60.92	0.39	20.97	4.76		2.46	8.18	2.03	0.33					100.04	60.8956	0.389844	20.9616	4.7581	0	2.45902	8.17673	2.02919	0.329868	100		Tonalite - G01/113	3.849	70.2819	0.272684	15.6945	2.03559	2.52486	0.0302983	4.42355	3.15102	1.58561	100
WW(1994)	103	950	1		62.76	0.38	20.56	3.62		2.68	7.5	2.2	0.36					100.06	62.7224	0.379772	20.5477	3.61783	0	2.67839	7.4955	2.19868	0.359784	100		Tonalite - G93/07	3.852	67.9565	0.494854	15.704	3.72572	1.54516	0.0706934	4.49408	4.82735	1.18159	100
WW(1994)	121	975	1		57.73	0.46	21.78	6.25		2.86	7.62	2.69	0.44					99.83	57.8283	0.460783	21.8171	6.26064	0	2.86487	7.63298	2.69458	0.440749	100		Tonalite - G99/22	3.862	67.8431	0.517035	16.312	3.19274	1.33821	0.0608277	4.67359	5.01828	1.04421	100
WW(1994)	119	975	1		57.54	0.47	20.93	5.99		3.48	9.24	2.07	0.28					100	57.54	0.47	20.93	5.99	0	3.48	9.24	2.07	0.28	100		Tonalite - G97/18	3.808	69.9947	0.250733	16.749	1.91317	0.942757	0.030088	3.95156	5.23531	0.932728	100
WW(1994)	138	990	1		58.26	0.48	22.39	6.19	0.15	1.55	9.21	1.48	0.31					100.02	58.2484	0.479904	22.3855	6.18876	0.14997	1.54969	9.20816	1.4797	0.309938	100		Tonalite G97/31	3.809	67.0626	0.311265	18.0032	2.13219	1.2049	0.0301224	5.04049	5.42204	0.793224	100
WW(1994)	134	1000	1		51.77	0.51	20.95	7.09	0.23	6.36	11.5	1.4	0.17					99.98	51.7804	0.510102	20.9542	7.09142	0.230046	6.36127	11.5023	1.40028	0.170034	100		Tonalite - G97/39	3.818	70.066	0.260954	16.7311	1.94167	0.943448	0.03011	3.96449	5.18896	0.873191	100
SD(1994)	B18	925	1.5	1.5	69.49	0.26	16.71	1.35		0.35	1.52	4.48	5.85				93.85	100.01	69.4831	0.259974	16.7083	1.34987	0	0.349965	1.51985	4.47955	5.84942	100		Tonalite - G97/38	3.811	70.0427	0.249689	16.7192	1.84229	0.888893	0.0299627	3.92511	5.32337	0.978781	100
SD(1994)	B4	950	1.5	1.5	70.09	0.54	16.1	2.38		0.69	2.52	4.64	3.05				93.31	100.01	70.083	0.539946	16.0984	2.37976	0	0.689931	2.51975	4.63954	3.0497	100		Tonalite - G97/97	3.795	72.087	0.301409	15.1709	2.23294	0.713335	0.0401879	2.83325	4.75222	1.86874	100
SD(1994)	B5	975	1.5	1.5	68.1	0.8	17.08	2.98		0.92	2.87	4.65	2.86				93.06	100.26	67.9234	0.797925	17.0357	2.97227	0	0.917614	2.86256	4.63794	2.85258	100		Tonalite -G97/98	3.795	69.8598	0.333002	16.3373	2.36984	0.968733	0.0504549	3.47129	4.93449	1.6751	100
SD(1994)	B17	1025	1.5	1.5	62.81	1.06	18.36	4.81		1.29	3.52	5.53	2.61				93.09	99.99	62.8163	1.06011	18.3618	4.81048	0	1.29013	3.52035	5.53055	2.61026	100		Tonalite - VM90/02	3.76	71.4122	0.314547	16.1231	2.14554	0.710267	0.03044	2.77004	5.06319	1.43068	100
SD(1994)	B8	900	2	1.5	71.16	0.3	15.95	1.2		0.36	1.04	4.74	5.24				92.96	99.99	71.1671	0.30003	15.9516	1.20012	0	0.360036	1.0401	4.74047	5.24052	100		Tonalite - 225892	3.7	69.8625	0.423593	16.0461	2.97713	0.927869	0.0403421	2.94498	5.10328	1.6742	100
SD(1994)	B16	950	2	1.5	67.66	0.61	17.45	1.89		0.62	1.61	4.89	5.29				92.08	100.02	67.6465	0.609878	17.4465	1.88962	0	0.619876	1.60968	4.88902	5.28894	100		Trondj - A0423	3.68	72.0872	0.375137	15.553	2.66709	0.841524	0.0506942	1.44985	4.55234	2.42318	100
SD(1994)	B9	1025	2	1.5	62	1.46	18.34	4.39		1.18	2.81	6.08	3.74				90.89	100	62	1.46	18.34	4.39	0	1.18	2.81	6.08	3.74	100		Trondj - A0404	3.62	76.7107	0.0907223	13.4975	0.981644	0.433451	0.0201605	1.87493	5.90703	0.483852	100
SD(1994)	D28	1150	2	1.5	56.4	2.29	17.61	7.55		2.14	5.61	5.91	2.49				92.27	100	56.4	2.29	17.61	7.55	0	2.14	5.61	5.91	2.49	100		Tonalite - G91/49	3.85	69.621	0.312609	15.6506	2.57694	2.6118	0.0403366	5.86898	1.51262	1.80506	100
RW(1995)	1	1000	0.8		71.14	0.18	17.67	2.05	0.08	0.48	1.24	5.04	2.12				92.87	100	71.14	0.18	17.67	2.05	0.08	0.48	1.24	5.04	2.12	100		Trondj - A9011	3.804	74.7016	0.100554	15.7065	1.1151	0.221219	0.0301662	1.4882	4.74615	1.89042	100
RW(1995)	1	1050	0.8		60.38	0.82	18.48	6.9		1.85	3.43	5.97	2.16				92.59	99.99	60.386	0.820082	18.4818	6.90069	0	1.85019	3.43034	5.9706	2.16022	100
RW(1995)	1	1075	0.8		58.21	1.34	20.01	4.1	0.25	2.89	3.19	6.78	1.17				95.51	97.94	59.4343	1.36818	20.4309	4.18624	0.255258	2.95079	3.2571	6.92261	1.19461	100
RW(1995)	1	1000	1.6		69.76	0.85	15.59	3.57	0.03	0.71	3.16	4.5	1.81				94.06	99.98	69.774	0.85017	15.5931	3.57071	0.030006	0.710142	3.16063	4.5009	1.81036	100
RW(1995)	1	1025	1.6		63.05	1.23	18.1	4.47	0.05	1.21	2.62	7.35	1.62				94.39	99.7	63.2397	1.2337	18.1545	4.48345	0.0501505	1.21364	2.62788	7.37212	1.62487	100
RW(1995)	1	1050	1.6		60.31	1.34	18.92	4.99	0.04	1.5	2.45	8.59	1.68				93.9	99.82	60.4188	1.34242	18.9541	4.999	0.0400721	1.5027	2.45442	8.60549	1.68303	100
RW(1995)	1	1100	1.6		58.22	1.58	18.6	6.66	0.15	2.08	3.38	7.85	1.49				95.55	100.01	58.2142	1.57984	18.5981	6.65933	0.149985	2.07979	3.37966	7.84922	1.48985	100
RW(1995)	1	1025	2.2		63.36	1	18.46	3.39	0.1	0.7	1.36	8.9	2.58				92.61	99.85	63.4552	1.0015	18.4877	3.39509	0.10015	0.701052	1.36204	8.91337	2.58388	100
RW(1995)	1	1050	2.2		64.85	1.12	18.24	3.17	0.04	0.61	1.07	8.74	2.15				94.32	99.99	64.8565	1.12011	18.2418	3.17032	0.040004	0.610061	1.07011	8.74087	2.15022	100
RW(1995)	1	1075	2.2		56.37	1.46	19.11	7.51	0.1	2.57	4.41	7.13	1.32				95.34	99.98	56.3813	1.46029	19.1138	7.5115	0.10002	2.57051	4.41088	7.13143	1.32026	100
RW(1995)	1	1100	2.2		54.13	1.5	18.3	9.95	0.2	2.98	4.98	6.49	1.44				95.6	99.97	54.1462	1.50045	18.3055	9.95299	0.20006	2.98089	4.98149	6.49195	1.44043	100
RW(1995)	1	1100	2.7		54.55	1.47	18.72	9.61	0.16	2.42	4.43	7.03	1.68				95.32	100.07	54.5118	1.46897	18.7069	9.60328	0.159888	2.41831	4.4269	7.02508	1.67882	100
RW(1995)	1	1100	3.2		65.93	1.31	17.55	3.15	0.12	1.02	1.47	6.72	2.55				92.4	99.82	66.0489	1.31236	17.5816	3.15568	0.120216	1.02184	1.47265	6.73212	2.5546	100
RW(1995)	2	1000	0.8		63.43	0.36	19.71	3.69	0.15	0.56	2.61	7.38	2.25				85.38	100.14	63.3413	0.359497	19.6824	3.68484	0.14979	0.559217	2.60635	7.36968	2.24685	100
RW(1995)	2	1050	0.8		58.99	1.08	16.52	9.51	0.16	1.52	5.25	4.38	2.6				93.7	100.01	58.9841	1.07989	16.5183	9.50905	0.159984	1.51985	5.24948	4.37956	2.59974	100
RW(1995)	2	1075	0.8		55.02	2.3	16.04	11.24	0.21	3.01	6.92	4.44	0.51				94.47	99.69	55.1911	2.30715	16.0899	11.275	0.210653	3.01936	6.94152	4.45381	0.511586	100
RW(1995)	2	1000	1.6		77.31	0.03	13.62	0.9	0.02	0.09	1.28	3.66	3.08				90.87	99.99	77.3177	0.030003	13.6214	0.90009	0.020002	0.090009	1.28013	3.66037	3.08031	100
RW(1995)	2	1050	1.6		61.41	1.95	18.13	6.05	0.1	1.29	4.01	6.52	0.64				93.76	100.1	61.3487	1.94805	18.1119	6.04396	0.0999001	1.28871	4.00599	6.51349	0.639361	100
RW(1995)	2	1100	1.6		56.71	2.37	18.12	8.81	0.11	2.72	6.33	5.38	0.37				93.73	100.92	56.193	2.34839	17.9548	8.72969	0.108997	2.6952	6.27229	5.33096	0.366627	100
RW(1995)	2	1125	1.6		53.47	2.57	18.22	9.92	0.12	3.18	6.93	5.26	0.33				96.86	100	53.47	2.57	18.22	9.92	0.12	3.18	6.93	5.26	0.33	100
RW(1995)	2	1025	2.2		65.43	1.05	17.71	3.23	0.11	0.82	3.1	7.55	0.76				92.36	99.76	65.5874	1.05253	17.7526	3.23777	0.110265	0.821973	3.10746	7.56816	0.761828	100
RW(1995)	2	1050	2.2		68.42	0.97	17.63	2.75	0.03	0.58	2.4	6.65	0.59				92.24	100.02	68.4063	0.969806	17.6265	2.74945	0.029994	0.579884	2.39952	6.64867	0.589882	100
RW(1995)	2	1075	2.2		53.58	2.51	17.7	10.56	0.16	3.07	6.02	5.68	0.45				95.21	99.73	53.7251	2.5168	17.7479	10.5886	0.160433	3.07831	6.0363	5.69538	0.451218	100
RW(1995)	2	1100	2.2		51.17	2.81	17.07	12.47	0.18	3.76	7.46	4.52	0.35				95.13	99.79	51.2777	2.81591	17.1059	12.4962	0.180379	3.76791	7.4757	4.52951	0.350737	100
RW(1995)	2	1075	2.7		46.71	2.62	14.16	19.12	0.41	3.12	6.54	5.03	1.03				95.2	98.74	47.3061	2.65343	14.3407	19.364	0.415232	3.15981	6.62346	5.09419	1.04314	100
RW(1995)	2	1100	2.7		53.31	2.3	17.51	11.43	0.13	3.03	5.82	5.6	0.54				95.25	99.67	53.4865	2.30762	17.568	11.4678	0.13043	3.04003	5.83927	5.61854	0.541788	100
RW(1995)	2	1075	3.2		70.1	0.94	15.54	1.78	0.07	0.43	1.89	5.44	3.82				93.97	100.01	70.093	0.939906	15.5384	1.77982	0.069993	0.429957	1.88981	5.43946	3.81962	100
RW(1995)	2	1125	3.2		70.22	1.1	15.84	2.2	0.11	0.68	2.78	5.75	1.17				91.18	99.85	70.3255	1.10165	15.8638	2.2033	0.110165	0.681022	2.78418	5.75864	1.17176	100
RW(1995)	2	1150	3.2		64.93	2.22	15.56	4.58	0.09	1.47	4.41	5.74	0.67				91.07	99.67	65.145	2.22735	15.6115	4.59516	0.090298	1.47487	4.4246	5.759	0.672218	100
RW(1995)	3	1000	0.8		75.06	0.09	14.37	2.26	0.06	0.52	3.57	3.5	0.55				89.63	99.98	75.075	0.090018	14.3729	2.26045	0.060012	0.520104	3.57071	3.5007	0.55011	100
RW(1995)	3	1050	0.8		55.58	0.74	17.62	10.44	0.15	3.07	6.79	5.05	0.36				93.27	99.8	55.6914	0.741483	17.6553	10.4609	0.150301	3.07615	6.80361	5.06012	0.360721	100
RW(1995)	3	1075	0.8		51.79	0.97	18.79	11.47	0.23	4.54	8.11	3.9	0.2				93.92	100	51.79	0.97	18.79	11.47	0.23	4.54	8.11	3.9	0.2	100
RW(1995)	3	980	1.6		77.24	0.13	12.46	0.59	0.03	0.13	2.07	4.17	1.79				91.09	98.61	78.3288	0.131832	12.6356	0.598317	0.0304229	0.131832	2.09918	4.22878	1.81523	100
RW(1995)	3	1000	1.6		72.77	0.65	14.5	2.81	0.04	0.47	1.73	5.15	1.88				96.74	100	72.77	0.65	14.5	2.81	0.04	0.47	1.73	5.15	1.88	100
RW(1995)	3	1040	1.6		64.89	0.29	18.09	5.79	0.35	0.72	5.48	4.05	0.5				88.64	100.16	64.7863	0.289537	18.0611	5.78075	0.349441	0.71885	5.47125	4.04353	0.499201	100
RW(1995)	3	1050	1.6		61.26	0.84	18.49	5.5		1.59	5.42	6.03	0.37				92.88	99.5	61.5678	0.844221	18.5829	5.52764	0	1.59799	5.44724	6.0603	0.371859	100
RW(1995)	3	1100	1.6		52.97	1.16	18.68	10.25	0.11	3.66	8.63	4.31	0.24				95.08	100.01	52.9647	1.15988	18.6781	10.249	0.109989	3.65963	8.62914	4.30957	0.239976	100
RW(1995)	3	1025	2.2		66	0.61	18.24	3.29	0.03	0.89	4.17	6.26	0.52				90.91	100.01	65.9934	0.609939	18.2382	3.28967	0.029997	0.889911	4.16958	6.25937	0.519948	100
RW(1995)	3	1050	2.2		65.93	0.81	17.83	3.4	0.05	1.17	4.7	5.4	0.49				93.92	99.78	66.0754	0.811786	17.8693	3.4075	0.0501102	1.17258	4.71036	5.41191	0.49108	100
RW(1995)	3	1075	2.2		55.12	0.95	18.93	9.34	0.16	3.33	7.64	4.3	0.24				93.47	100.01	55.1145	0.949905	18.9281	9.33907	0.159984	3.32967	7.63924	4.29957	0.239976	100
RW(1995)	3	1100	2.2		52.64	1.41	17.5	12.69	0.2	3.37	7.49	4.28	0.36				93.17	99.94	52.6716	1.41085	17.5105	12.6976	0.20012	3.37202	7.4945	4.28257	0.360216	100
RW(1995)	3	1075	2.7		51.32	2.53	14.67	17.05	0.28	2.95	7.05	4.19	0.8				93.84	100.84	50.8925	2.50893	14.5478	16.908	0.277668	2.92543	6.99127	4.1551	0.793336	100
RW(1995)	3	1100	2.7		55.26	1.1	18.4	9.32	0.15	3.16	7.23	4.53	0.26				94.02	99.41	55.588	1.10653	18.5092	9.37531	0.15089	3.17875	7.27291	4.55689	0.261543	100
RW(1995)	4	1000	0.8		73.86	0.12	14.04	2.63	0.08	0.48	3.43	4.1	0.94				91.59	99.68	74.0971	0.120385	14.0851	2.63844	0.0802568	0.481541	3.44101	4.11316	0.943018	100
RW(1995)	4	1050	0.8		57.95	1.45	17.42	9.51	0.24	2.17	5.97	4.52	0.78				92.73	100.01	57.9442	1.44986	17.4183	9.50905	0.239976	2.16978	5.9694	4.51955	0.779922	100
RW(1995)	4	1075	0.8		51.77	1.61	16	13.67	0.28	4.4	8.69	3.28	0.3				93.64	100	51.77	1.61	16	13.67	0.28	4.4	8.69	3.28	0.3	100
RW(1995)	4	1025	1.6		67.2	0.99	16.32	4.05	0.13	0.96	4.81	4.88	0.61				94.35	99.95	67.2336	0.990495	16.3282	4.05203	0.130065	0.96048	4.81241	4.88244	0.610305	100
RW(1995)	4	1050	1.6		61.6	1.25	17.57	6.18	0.11	1.48	6.26	4.86	0.47				91.4	99.78	61.7358	1.25276	17.6087	6.19363	0.110243	1.48326	6.2738	4.87072	0.471036	100
RW(1995)	4	1100	1.6		56.53	1.44	17.68	8.98	0.11	2.37	7.76	4.36	0.34				93.53	99.57	56.7741	1.44622	17.7564	9.01878	0.110475	2.38024	7.79351	4.37883	0.341468	100
RW(1995)	4	1025	2.2		68.04	1.11	15.97	3.76	0.09	0.71	4.41	5.16	0.69				90.35	99.94	68.0808	1.11067	15.9796	3.76226	0.090054	0.710426	4.41265	5.1631	0.690414	100
RW(1995)	4	1050	2.2		68.65	1.09	15.99	3.76	0.09	0.83	4.28	4.68	0.63				93.2	100	68.65	1.09	15.99	3.76	0.09	0.83	4.28	4.68	0.63	100
RW(1995)	4	1075	2.2		55.68	1.67	17.23	10.43	0.13	2.84	8.06	3.53	0.36				94.04	99.93	55.719	1.67117	17.2421	10.4373	0.130091	2.84199	8.06565	3.53247	0.360252	100
RW(1995)	4	1100	2.2		53.35	1.56	17.2	12.58	0.19	3.5	8.17	3.07	0.35				84.81	99.97	53.366	1.56047	17.2052	12.5838	0.190057	3.50105	8.17245	3.07092	0.350105	100
RW(1995)	4	1100	2.7		55.55	1.88	16.72	11.43	0.16	2.77	7.63	3.37	0.4				94.09	99.91	55.6	1.88169	16.7351	11.4403	0.160144	2.7725	7.63687	3.37304	0.40036	100
R(1991)	ABA	950	0.8		54.62	0.85	16.57	6.63	0.09	1.2	4.11	1.2	0.88				86.15	86.15	63.401	0.986651	19.2339	7.69588	0.104469	1.39292	4.77075	1.39292	1.02147	100
R(1991)	ABA	1000	0.8		53.47	1.33	17.73	7.3	0.17	3.27	5.64	2.27	1.21				92.39	92.39	57.8742	1.43955	19.1904	7.90129	0.184003	3.53934	6.10456	2.45698	1.30967	100
R(1991)	IAT	950	0.8		54.76	1.11	15.86	7.01	0.14	3.98	5.08	2.11	0.89				90.94	90.94	60.2155	1.22059	17.4401	7.70838	0.153948	4.37651	5.5861	2.32021	0.978667	100
BL(1991)	557	900	0.1	d 1.9	77.01	0.23	12.31	2.18	0.05	0.51	2.42	3.15	1.92		0.05			99.83	77.1798	0.230507	12.3371	2.18481	0.0501102	0.511124	2.42534	3.15695	1.92423	100
BL(1991)	557	925	0.1	d 4.03	73.38	0.57	15.02	2.71	0.02	0.5	3.31	2.91	1.58					100	73.38	0.57	15.02	2.71	0.02	0.5	3.31	2.91	1.58	100
BL(1991)	557	950	0.1	d 2.48	72.61	0.61	14.55	3.29	0.07	0.7	3.59	3.12	1.47					100.01	72.6027	0.609939	14.5485	3.28967	0.069993	0.69993	3.58964	3.11969	1.46985	100
BL(1991)	557	1000	0.1	d 2.01	65.34	0.85	15.89	6.32	0.07	1.79	5.44	3.35	0.96					100.01	65.3335	0.849915	15.8884	6.31937	0.069993	1.78982	5.43946	3.34967	0.959904	100
BL(1991)	557	900	0.1	w 5.42	79.84	0.14	11.89	1.05	0.03	0.42	1.69	2.85	2.02		0.07			100	79.8959	0.140098	11.8983	1.05074	0.030021	0.420294	1.69118	2.852	2.02141	100
BL(1991)	557	950	0.1	w 5.24	68.23	0.63	16.47	4.24	0.08	1.3	4.05	3.74	1.07		0.19			100	68.3599	0.631199	16.5014	4.24807	0.0801523	1.30247	4.05771	3.74712	1.07204	100
BL(1991)	557	1000	0.1	w 5.33	65.01	0.72	17.12	5.51	0.17	2.04	5.01	3.25	0.97		0.2			100	65.1403	0.721443	17.1543	5.52104	0.170341	2.04409	5.02004	3.25651	0.971944	100
BL(1991)	557	900	0.3	d 5.2	76.16	0.4	13.03	2.29	0.08	0.6	2.67	3.01	1.66		0.08			99.98	76.2362	0.4004	13.043	2.29229	0.0800801	0.600601	2.67267	3.01301	1.66166	100
BL(1991)	557	950	0.3	d 3.41	72.55	0.74	14.54	3.44	0.05	0.69	3.13	3.13	1.48		0.25			100	72.7318	0.741855	14.5764	3.44862	0.0501253	0.691729	3.13784	3.13784	1.48371	100
BL(1991)	557	1000	0.3	d 4.31	69.09	0.9	15.95	4.55	0.08	0.51	3.71	3.46	1.52		0.25			100.02	69.2493	0.902075	15.9868	4.56049	0.0801844	0.511176	3.71855	3.46798	1.5235	100
BL(1991)	557	850	0.3	w 9.89	74.37	0.36	16.15	1.76	0.09	0.25	3.25	2.7	1.01		0.09			100.03	74.4146	0.360216	16.1597	1.76106	0.090054	0.25015	3.25195	2.70162	1.01061	100
BL(1991)	557	875	0.3	w 7.92	71.85	0.38	16.95	1.95	0.15	0.56	3.99	3.1	0.89		0.18			100	71.9796	0.380685	16.9806	1.95352	0.15027	0.56101	3.99719	3.10559	0.891605	100
BL(1991)	557	900	0.3	w 9.22	70.89	0.36	17.66	1.88	0.08	0.48	4.47	3.13	0.85		0.22			100.02	71.0321	0.360721	17.6954	1.88377	0.0801603	0.480962	4.47896	3.13627	0.851703	100
BL(1991)	557	950	0.3	w 6.71	64	0.43	21.19	3.01	0.11	0.76	6.28	3.58	0.64		0.19			100.19	64	0.43	21.19	3.01	0.11	0.76	6.28	3.58	0.64	100
BL(1991)	557	1000	0.69	d 4.37	69.11	0.93	16.33	4.2	0.04	0.5	3.8	3.36	1.48		0.24			99.99	69.2832	0.932331	16.3709	4.21053	0.0401003	0.501253	3.80952	3.36842	1.48371	100
BL(1991)	557	800	0.69	w 11.9	71.73	0.2	18.16	1.16	0.07	0.1	5.01	2.82	0.67		0.09			100.01	71.7874	0.20016	18.1745	1.16093	0.070056	0.10008	5.01401	2.82226	0.670536	100
BL(1991)	555	900	0.1	d 1.2	78.7	0.47	12.19	1.77	0.04	0.94	1.74	3.94	0.21					100	78.7	0.47	12.19	1.77	0.04	0.94	1.74	3.94	0.21	100
BL(1991)	555	925	0.1	d 1.02	74.86	0.63	14.23	2.65	0.09	0.59	1.98	4.71	0.21		0.09			100.04	74.8974	0.630315	14.2371	2.65133	0.090045	0.590295	1.98099	4.71236	0.210105	100
BL(1991)	555	950	0.1	d 1.56	71.75	0.85	14.77	3.42	0.11	0.9	2.49	5.3	0.18		0.21			99.98	71.9154	0.85196	14.804	3.42788	0.110254	0.902075	2.49574	5.31222	0.180415	100
BL(1991)	555	1000	0.1	d 2.29	64.98	1.69	14.33	7.74	0.26	1.94	4.41	4.49	0.15					99.99	64.9865	1.69017	14.3314	7.74077	0.260026	1.94019	4.41044	4.49045	0.150015	100
BL(1991)	555	900	0.1	w 7.56	77.92	0.29	14.26	1.27	0.08	0.41	1.85	3.68	0.23		0.04			100.03	77.9278	0.290029	14.2614	1.27013	0.080008	0.410041	1.85019	3.68037	0.230023	100
BL(1991)	555	950	0.1	w 3.5	67.86	1.18	16.06	4.89	0.1	1.35	2.86	5.1	0.14		0.47			100.01	68.1736	1.18545	16.1342	4.9126	0.100462	1.35624	2.87322	5.12357	0.140647	100
BL(1991)	555	1000	0.1	w 2.51	58.4	1.45	16.98	7.68	0.12	3.8	6.72	4.52	0.07		0.3			100.04	58.5522	1.45378	17.0243	7.70002	0.120313	3.80991	6.73752	4.53178	0.0701825	100
BL(1991)	555	900	0.3	d 1.96	75.8	0.47	13.91	2.69	0.1	0.54	1.89	4.3	0.23		0.07			100	75.8531	0.470329	13.9197	2.69188	0.10007	0.540378	1.89132	4.30301	0.230161	100
BL(1991)	555	950	0.3	d 2.83	72.62	0.69	15.08	3.17	0.11	0.69	2.49	4.75	0.22		0.2			100.02	72.751	0.691244	15.1072	3.17572	0.110198	0.691244	2.49449	4.75857	0.220397	100
BL(1991)	555	1000	0.3	d 3.04	64.78	1.42	15.62	6.79	0.13	1.71	3.89	4.91	0.15		0.61			100.01	65.171	1.42857	15.7143	6.83099	0.130785	1.72032	3.91348	4.93964	0.150905	100
BL(1991)	555	850	0.3	w 7.85	74.13	0.43	17.06	1.68	0.1	0.24	2.38	3.77	0.12		0.13			100.04	74.1968	0.430387	17.0754	1.68151	0.10009	0.240216	2.38214	3.7734	0.120108	100
BL(1991)	555	875	0.3	w 6.22	70.16	0.42	18.77	1.72	0.11	0.28	3.55	4.71	0.1		0.21			100.03	70.2865	0.420757	18.8038	1.7231	0.110198	0.280505	3.5564	4.71849	0.10018	100
BL(1991)	555	900	0.3	w 7.21	68.13	0.44	19.16	2.2	0.14	0.53	4.61	4.35	0.12		0.27			99.95	68.3487	0.441413	19.2215	2.20706	0.140449	0.531701	4.6248	4.36396	0.120385	100
BL(1991)	555	950	0.3	w 5.30	66	0.97	19.7	2.66	0.13	0.45	4.7	4.88	0.1		0.41			100	66.2717	0.973993	19.7811	2.67095	0.130535	0.451853	4.71935	4.90009	0.100412	100
BL(1991)	555	950	0.69	d 5.26	71.94	0.68	15.89	3.36	0.07	0.43	2.62	4.51	0.23		0.3			100.03	72.1348	0.681841	15.933	3.3691	0.0701895	0.431164	2.62709	4.52221	0.230623	100
BL(1991)	555	1000	0.69	d 5.85	67.88	0.92	16.17	5.57	0.08	0.85	2.96	4.76	0.19		0.61			99.99	68.3035	0.92574	16.2709	5.60475	0.0804991	0.855303	2.97847	4.7897	0.191185	100
BL(1991)	555	800	0.69	w 10.74	70.06	0.18	19.8	0.81	0.06	0.04	3.74	5.11	0.09		0.08			99.97	70.1372	0.180198	19.8218	0.810892	0.0600661	0.040044	3.74412	5.11563	0.0900991	100
BL(1991)	555	850	0.69	w 9.01	69.35	0.26	20.11	0.93	0.04	0.08	4.07	4.88	0.1		0.16			99.98	69.4751	0.260469	20.1463	0.931677	0.0400721	0.0801443	4.07734	4.8888	0.10018	100
BL(1991)	555	900	0.69	w 9.87	68.1	0.51	19.86	1.54	0.08	0.11	4.89	4.45	0.07		0.39			100	68.3666	0.511997	19.9378	1.54603	0.0803132	0.110431	4.90915	4.46742	0.0702741	100
BL(1991)	478	900	0.1	d 2.37	79.23	0.38	11.61	1.9	0.04	0.61	2.05	3.1	1.09					100.01	79.2221	0.379962	11.6088	1.89981	0.039996	0.609939	2.0498	3.09969	1.08989	100
BL(1991)	478	925	0.1	d 3.22	73.29	0.66	13.14	3.07	0.1	1.49	4.05	3.32	0.88					100	73.29	0.66	13.14	3.07	0.1	1.49	4.05	3.32	0.88	100
BL(1991)	478	950	0.1	d 4.21	73.32	0.77	13.78	3.28	0.16	1.14	3.15	3.5	0.91					100.01	73.3127	0.769923	13.7786	3.27967	0.159984	1.13989	3.14969	3.49965	0.909909	100
BL(1991)	478	1000	0.1	d 2.92	64.34	1.6	15.96	6.15	0.2	1.76	5.64	3.85	0.5					100	64.34	1.6	15.96	6.15	0.2	1.76	5.64	3.85	0.5	100
BL(1991)	478	900	0.1	w 8.6	79.72	0.32	12.81	1.01	0.08	0.5	1.98	2.12	1.43		0.04			100.01	79.7439	0.320096	12.8138	1.0103	0.080024	0.50015	1.98059	2.12064	1.43043	100
BL(1991)	478	950	0.1	w 5.3	67.82	1.25	16.24	3.89	0.15	1.11	4.01	4.39	0.6		0.55			100.01	68.1882	1.25679	16.3282	3.91112	0.150814	1.11603	4.03177	4.41383	0.603258	100
BL(1991)	478	1000	0.1	w 4.9	63.46	1.72	18.41	5.16	0.04	1.08	5.02	4.28	0.44		0.39			100	63.7085	1.72673	18.4821	5.1802	0.0401566	1.08423	5.03965	4.29676	0.441723	100
BL(1991)	478	900	0.3	d 4.94	76.56	0.43	13.11	2.39	0.08	0.49	2.72	3.21	0.92		0.07			99.98	76.629	0.430387	13.1218	2.39215	0.0800721	0.490441	2.72245	3.21289	0.920829	100
BL(1991)	478	950	0.3	d 2.97	73.07	0.67	13.92	3.59	0.1	0.83	3.4	3.43	0.85		0.15			100.01	73.1724	0.670939	13.9395	3.59503	0.10014	0.831164	3.40477	3.43481	0.851192	100
BL(1991)	478	1000	0.3	d 3.75	62.85	1.56	15.54	7.91	0.16	2.08	5.61	3.15	0.58		0.58			100.02	63.2039	1.56879	15.6275	7.95455	0.160901	2.09171	5.64159	3.16774	0.583266	100
BL(1991)	478	850	0.3	w 9.55	74.29	0.35	16.2	1.89	0.11	0.43	3.52	2.57	0.54		0.12			100.02	74.3644	0.35035	16.2162	1.89189	0.11011	0.43043	3.52352	2.57257	0.540541	100
BL(1991)	478	875	0.3	w 7.84	71.63	0.37	17.26	1.87	0.15	0.49	4.07	3.54	0.43		0.21			100.02	71.7664	0.370704	17.2929	1.87356	0.150286	0.490933	4.07775	3.54674	0.430819	100
BL(1991)	478	900	0.3	w 8.7	71.07	0.34	17.77	1.85	0.1	0.47	4.33	3.43	0.38		0.25			99.99	71.2553	0.340886	17.8163	1.85482	0.100261	0.471225	4.34129	3.43894	0.380991	100
BL(1991)	478	950	0.3	w 8.76	63.84	1.12	19.15	4.34	0.18	1.39	6.01	3.24	0.34		0.39			100	64.09	1.12439	19.225	4.35699	0.180705	1.39544	6.03353	3.25269	0.341331	100
BL(1991)	478	850	0.69	d 5.73	75.64	0.16	14.49	2.1	0.06	0.24	2.7	2.83	1.76					99.98	75.6551	0.160032	14.4929	2.10042	0.060012	0.240048	2.70054	2.83057	1.76035	100
BL(1991)	478	900	0.69	d 4.79	72.31	0.59	15.3	2.93	0.06	0.87	3.76	3.05	0.96		0.18			100.01	72.4331	0.591005	15.3261	2.93499	0.0601022	0.871482	3.7664	3.05519	0.961635	100
BL(1991)	478	950	0.69	d 3.76	71.01	0.64	15.63	3.81	0.06	0.47	3.63	3.5	1.02		0.27			100.04	71.1737	0.641475	15.666	3.81878	0.0601383	0.471083	3.63837	3.50807	1.02235	100
BL(1991)	478	1000	0.69	d 6.33	65.84	0.88	15.14	6.95	0.13	1.7	5.31	2.79	0.8		0.49			100.03	66.1443	0.884067	15.21	6.98212	0.130601	1.70786	5.33454	2.80289	0.803697	100
BL(1991)	478	800	0.69	w 12.45	71.36	0.21	18.23	1.37	0.07	0.18	4.87	3	0.39		0.08			99.76	71.5891	0.210674	18.2885	1.3744	0.0702247	0.180578	4.88563	3.00963	0.391252	100
BL(1991)	478	850	0.69	w 10.61	69.22	0.21	19.79	1.12	0.03	0.04	6.1	3.05	0.3		0.2			100.06	69.317	0.210294	19.8177	1.12157	0.0300421	0.0400561	6.10855	3.05428	0.300421	100
BL(1991)	478	900	0.69	w 10.63	65.39	0.57	21.01	1.82	0.1	0.22	7.17	3.02	0.28		0.41			99.99	65.6658	0.572404	21.0986	1.82768	0.100422	0.220928	7.20024	3.03274	0.281181	100
BL(1991)	478	950	0.69	w 10.13	64.25	1.07	21.15	2.07	0.11	0.21	7.47	3.03	0.28		0.38			100.02	64.4821	1.07387	21.2264	2.07748	0.110397	0.210759	7.49699	3.04095	0.281012	100
BL(1991)	466	900	0.1	d 1.74	75.12	0.41	13.83	2.15	0.04	0.56	3.71	3.04	1.14					100	75.12	0.41	13.83	2.15	0.04	0.56	3.71	3.04	1.14	100
BL(1991)	466	925	0.1	d 3.38	73.46	0.59	13.74	3.13	0.13	0.9	3.13	2.94	1.18		0.15			99.35	74.0524	0.594758	13.8508	3.15524	0.131048	0.907258	3.15524	2.96371	1.18952	100
BL(1991)	466	950	0.1	d 4.43	71.53	0.76	13.48	3.31	0.18	1.4	4.5	2.81	1.18					99.15	72.1432	0.766515	13.5956	3.33838	0.181543	1.412	4.53858	2.83409	1.19012	100
BL(1991)	466	1000	0.1	d 4.93	61.91	1.42	15.74	7.67	0.33	2.7	6.65	2.82	0.77					100.01	61.9038	1.41986	15.7384	7.66923	0.329967	2.69973	6.64934	2.81972	0.769923	100
BL(1991)	466	900	0.1	w 7.64	68.67	0.96	16.99	3.22	0.15	0.84	4.15	3.63	0.89		0.5			100	69.0151	0.964824	17.0754	3.23618	0.150754	0.844221	4.17085	3.64824	0.894472	100
BL(1991)	466	950	0.1	w 5.73	63.43	1.18	18.43	4.96	0.22	1.81	5	3.72	0.68		0.64			100.07	63.7936	1.18676	18.5357	4.98843	0.221261	1.82038	5.02866	3.74133	0.683898	100
BL(1991)	466	900	0.3	d 4.19	73.63	0.46	14.23	2.93	0.09	0.7	3.66	2.97	1.17		0.16			100	73.748	0.460737	14.2528	2.9347	0.0901442	0.701122	3.66587	2.97476	1.17187	100
BL(1991)	466	1000	0.3	d 6.31	60.87	1.53	14.1	9.6	0.37	3.09	6.37	2.41	0.88		0.96			100.18	61.3485	1.54203	14.2108	9.67547	0.372909	3.11429	6.42008	2.42895	0.886918	100
BL(1991)	466	850	0.3	w 10.03	74.75	0.38	15.59	1.87	0.22	0.38	3.67	2.43	0.52		0.14			99.95	74.8923	0.380723	15.6197	1.87356	0.220419	0.380723	3.67699	2.43463	0.52099	100
BL(1991)	466	875	0.3	w 7.61	71.11	0.4	16.71	2.48	0.24	1.09	4.2	3.05	0.52		0.18			99.98	71.2525	0.400802	16.7435	2.48497	0.240481	1.09218	4.20842	3.05611	0.521042	100
BL(1991)	466	900	0.3	w 9.05	70.59	0.42	17.21	2.24	0.21	1.11	4.43	2.83	0.53		0.42			99.99	70.8948	0.421814	17.2843	2.24967	0.210907	1.11479	4.44913	2.84222	0.532289	100
BL(1991)	466	950	0.3	w 9.04	63.32	0.8	20.68	3.22	0.27	0.88	6.94	2.88	0.43		0.57			99.99	63.6894	0.804667	20.8006	3.23878	0.271575	0.885134	6.98049	2.8968	0.432509	100
BL(1991)	466	1000	0.69	d 8.79	66.28	1.13	16.94	5.25	0.13	0.56	5.13	2.81	1.15		0.73			100.11	66.6935	1.13705	17.0457	5.28275	0.130811	0.563494	5.162	2.82753	1.15717	100
BL(1991)	571	900	0.1	d 3.16	73.47	0.22	15.11	1.7	0.14	0.39	2.87	3.56	2.52					99.98	73.4847	0.220044	15.113	1.70034	0.140028	0.390078	2.87057	3.56071	2.5205	100
BL(1991)	571	925	0.1	d 4.64	71.4	0.59	16.5	2.16	0.08	0.82	3.1	3.07	2.28					100	71.4	0.59	16.5	2.16	0.08	0.82	3.1	3.07	2.28	100
BL(1991)	571	950	0.1	d 3.61	71.11	0.77	15.88	2.55	0.05	0.95	2.64	3.83	2.2					99.98	71.1242	0.770154	15.8832	2.55051	0.05001	0.95019	2.64053	3.83077	2.20044	100
BL(1991)	571	1000	0.1	d 1.33	64.19	1.28	16.46	5.56	0.22	2.13	3.99	4.88	1.27					99.98	64.2028	1.28026	16.4633	5.56111	0.220044	2.13043	3.9908	4.88098	1.27025	100
BL(1991)	571	900	0.1	w 6.05	74.94	0.13	14.83	1	0.11	0.32	3.07	3.49	2.11		0.01			100.01	74.94	0.13	14.83	1	0.11	0.32	3.07	3.49	2.11	100
BL(1991)	571	950	0.1	w 3.38	66.6	0.93	18.25	3.36	0.13	0.58	2.93	5.06	1.61		0.55			100	66.9683	0.935143	18.3509	3.37858	0.130719	0.583208	2.9462	5.08798	1.6189	100
BL(1991)	571	1000	0.1	w 5.76	64.93	1.16	19.85	3.08	0.17	0.79	3.71	4.5	1.26		0.48			99.93	65.2891	1.16642	19.9598	3.09703	0.17094	0.794369	3.73052	4.52489	1.26697	100
BL(1991)	571	900	0.3	d 5.99	73.23	0.49	15.15	2.07	0.08	0.47	2.11	3.77	2.56		0.08			100.01	73.2813	0.490343	15.1606	2.07145	0.080056	0.470329	2.11148	3.77264	2.56179	100
BL(1991)	571	850	0.3	w 11.08	72.68	0.31	17.05	1.52	0.1	0.12	2.91	3.59	1.56		0.19			100.03	72.7965	0.310497	17.0773	1.52244	0.10016	0.120192	2.91466	3.59575	1.5625	100
BL(1991)	571	900	0.3	w 11.61	70.02	0.48	18.24	1.89	0.16	0.31	3.74	3.91	1.02		0.25			100.02	70.1814	0.481107	18.282	1.89436	0.160369	0.310715	3.74862	3.91901	1.02235	100
BL(1991)	571	950	0.3	w 8.17	64.03	0.81	21.22	2.49	0.3	0.33	5.89	3.88	0.73		0.39			100.07	64.2356	0.8126	21.2881	2.49799	0.300963	0.331059	5.90891	3.89246	0.732343	100
BL(1991)	571	850	0.69	d 3.48	74.74	0.12	14.66	1.96	0.08	0.38	2.42	3.1	2.49		0.09			100.04	74.7774	0.12006	14.6673	1.96098	0.08004	0.38019	2.42121	3.10155	2.49125	100
BL(1991)	571	900	0.69	d 8.09	73.03	0.41	15.58	2.3	0.07	0.72	3.2	2.58	1.98		0.11			99.98	73.1251	0.410534	15.6003	2.30299	0.0700911	0.720937	3.20417	2.58336	1.98258	100
BL(1991)	571	950	0.69	d 5.21	70.4	0.64	17.34	2.18	0.09	0.3	2.67	3.63	2.33		0.37			99.95	70.6969	0.642699	17.4131	2.18919	0.0903796	0.301265	2.68126	3.64531	2.33983	100
BL(1991)	571	800	0.69	w 10.43	71.51	0.25	18.17	1.22	0.02	0.07	4.21	3.52	1		0.06			100.03	71.5315	0.250075	18.1755	1.22037	0.020006	0.070021	4.21126	3.52106	1.0003	100
BL(1991)	571	850	0.69	w 9.73	69.15	0.2	20.22	0.8	0.08	0.01	5.37	3.52	0.7		0.13			100.18	69.1154	0.1999	20.2099	0.7996	0.07996	0.009995	5.36732	3.51824	0.69965	100
BL(1991)	571	900	0.69	w 11.91	65.61	0.51	21.91	1.21	0.14	0.06	6.82	2.94	0.48		0.3			99.98	65.8206	0.511637	21.9803	1.21388	0.140449	0.0601926	6.84189	2.94944	0.481541	100
BL(1991)	571	950	0.69	w 10.47	63.71	0.61	22.16	1.76	0.12	0.19	6.75	3.61	0.6		0.37			99.88	64.0237	0.613004	22.2691	1.76867	0.120591	0.190936	6.78324	3.62778	0.602954	100
LS(2012)	1	870	1.9	21	74.7	0.1	14.7	2	0.1	0.4	2.4	5.4	0.1					99.9	74.7748	0.1001	14.7147	2.002	0.1001	0.4004	2.4024	5.40541	0.1001	100
LS(2012)	2	900	1.9	20	74.4	0.3	14.7	2.4		0.5	2.7	4.9	0.1					100	74.4	0.3	14.7	2.4	0	0.5	2.7	4.9	0.1	100
LS(2012)	3	880	2.2	19	75.2	0.5	14.6	2.2		0.3	2.2	4.9	0.1					100	75.2	0.5	14.6	2.2	0	0.3	2.2	4.9	0.1	100
LS(2012)	4	870	2.6	25	75.3	0.4	14.1	2.4		0.2	2.3	5.3	0.2					100.2	75.1497	0.399202	14.0719	2.39521	0	0.199601	2.29541	5.28942	0.199601	100
LS(2012)	5	870	2.9	29	75.3	0.4	14	2.3		0.2	2.2	5.4	0.1					99.9	75.3754	0.4004	14.014	2.3023	0	0.2002	2.2022	5.40541	0.1001	100
LS(2012)	6	870	3	32	75.1	0.2	14.1	2.1		0.3	2.3	5.9	0.1					100.1	75.025	0.1998	14.0859	2.0979	0	0.2997	2.2977	5.89411	0.0999001	100
SS1997	S60518	940	0.5	1	70.95	0.54	13.85	1.87289	0.2	1.75	5.23	4.35	1.19				87.84	99.9329	70.9976	0.540363	13.8593	1.87414	0.200134	1.75118	5.23351	4.35292	1.1908	100
SS1997	S61006	900	1	1	71.35	0.28	16.09	1.77689	0.1	0.6	5.56	3.53	0.64				87.34	99.9269	71.4022	0.280205	16.1018	1.77819	0.100073	0.600439	5.56407	3.53258	0.640468	100
SS1997	S61511	1000	1.5	1	68.1	0.68	19.37	2.24888	0.03	0.54	3.76	4.67	0.52				91.4	99.9189	68.1553	0.680552	19.3857	2.2507	0.0300244	0.540438	3.76305	4.67379	0.520422	100
SS1997	351115/5	1115	0.5		58.32	2.9	16.1	7.00543	0.3	3.68	6.93	3.35	1.11				94.91	99.6954	58.4982	2.90886	16.1492	7.02683	0.300916	3.69124	6.95117	3.36023	1.11339	100
SS1997	351100/1	1100	1.5		61.49	1.27	20.21	5.43776	0.15	0.81	6.72	2.62	1.14				95.27	99.8478	61.5838	1.27194	20.2408	5.44605	0.150229	0.811235	6.73025	2.62399	1.14174	100
SS1997	S371502	900	1.5	1	72.28	0.27	16.79	0.796954	0.01	0.37	4.07	4.96	0.4				90.32	99.947	72.3184	0.270143	16.7989	0.797377	0.0100053	0.370196	4.07216	4.96263	0.400212	100
SS1997	S371004	1000	1	1	64.18	0.75	19.55	3.21485	0.16	1.76	7.26	2.72	0.33				92.03	99.9249	64.2283	0.750564	19.5647	3.21727	0.16012	1.76132	7.26546	2.72205	0.330248	100
SS1997	S370527	940	0.5	1	74.35	0.34	14.31	1.51491	0.12	1.05	3.75	3.9	0.62				86.64	99.9549	74.3835	0.340153	14.3165	1.51559	0.120054	1.05047	3.75169	3.90176	0.62028	100
SS1997	S371205	1000	1.25	1	66.99	0.53	17.92	2.69786	0.08	1.57	4.98	4.85	0.29				91.23	99.9079	67.0518	0.530489	17.9365	2.70034	0.0800738	1.57145	4.98459	4.85447	0.290267	100
PDB(1995)		875	0.3	1.4	74.7	0.31	14.9	1.86	0.05	0.41	2.97	2.37	2.3					99.87	74.7972	0.310404	14.9194	1.86242	0.0500651	0.410534	2.97387	2.37309	2.30299	100
PDB(1995)		900	0.3	1.4	75.7	0.36	12.6	2.02	0.18	0.48	2.98	2.6	2.76					99.68	75.943	0.361156	12.6404	2.02648	0.180578	0.481541	2.98957	2.60835	2.76886	100
PDB(1995)		925	0.3	1.4	74.9	0.38	13.6	1.27	0.16	0.54	3.01	3.1	2.63					99.59	75.2084	0.381564	13.656	1.27523	0.160659	0.542223	3.02239	3.11276	2.64083	100
PDB(1995)		900	0.5	1.4	75	0.41	13.2	2.42	0.11	0.64	2.03	1.88	3.88					99.57	75.3239	0.411771	13.257	2.43045	0.110475	0.642764	2.03877	1.88812	3.89676	100
PDB(1995)		925	0.5	1.4	76	0.48	13.2	2.46	0.07	0.64	2.82	1.63	2.34					99.64	76.2746	0.481734	13.2477	2.46889	0.0702529	0.642312	2.83019	1.63589	2.34845	100
PDB(1995)		900	0.7	1.4	73.6	0.47	14.5	1.72	0.09	0.5	2.78	2.27	3.79					99.72	73.8067	0.47132	14.5407	1.72483	0.0902527	0.501404	2.78781	2.27637	3.80064	100
PDB(1995)		925	0.7	1.4	73	0.52	14.3	2.48	0.19	0.64	3.02	2.79	2.74					99.68	73.2343	0.521669	14.3459	2.48796	0.19061	0.642055	3.0297	2.79896	2.7488	100
PDB(1995)		950	0.7	1.4	71.3	0.68	14.4	2.95	0.1	1.05	3.63	2.08	3.53					99.72	71.5002	0.681909	14.4404	2.95828	0.100281	1.05295	3.64019	2.08584	3.53991	100
PDB(1995)		900	1	1.4	76.1	0.34	14.9	2.01	0.06	0.5	2.81	0.95	2.17					99.84	76.222	0.340545	14.9239	2.01322	0.0600962	0.500801	2.8145	0.951522	2.17348	100
PDB(1995)		910	1	1.4	72.7	0.42	15.1	2.12	0.16	0.7	3.04	1.91	3.69					99.84	72.8165	0.420673	15.1242	2.1234	0.160256	0.701122	3.04487	1.91306	3.69591	100
PDB(1995)		925	1	1.4	72.6	0.41	15.3	2.65	0.08	0.64	3.29	2.17	2.65					99.79	72.7528	0.410863	15.3322	2.65558	0.0801684	0.641347	3.29692	2.17457	2.65558	100
PDB(1995)		950	1	1.4	72	0.55	15	3	0.2	0.79	3.42	2.38	2.41					99.75	72.1805	0.551378	15.0376	3.00752	0.200501	0.79198	3.42857	2.38596	2.41604	100
PDB(1995)		975	1	1.4	71.1	0.69	15.6	3.16	0.12	0.89	4.08	2.12	2.05					99.81	71.2353	0.691313	15.6297	3.16602	0.120228	0.891694	4.08777	2.12404	2.0539	100
PDB(1995)		1000	1	1.4	70.1	1.26	13.8	3.75	0.15	1.11	3.65	2.56	3.26					99.64	70.3533	1.26455	13.8499	3.76355	0.150542	1.11401	3.66319	2.56925	3.27178	100
PDB(1995)		930	12.5	1.4	74.3	0.4	14.8	1.8	0.06	0.45	2.24	2.81	3.09					99.95	74.3372	0.4002	14.8074	1.8009	0.06003	0.450225	2.24112	2.81141	3.09155	100
PDB(1995)		960	12.5	1.4	72.9	0.58	15	2.16	0.05	0.54	2.29	2.87	3.32					99.71	73.112	0.581687	15.0436	2.16628	0.0501454	0.541571	2.29666	2.87835	3.32966	100
PDB(1995)		950	1.5	1.4	73.7	0.33	15.5	1.36	0.04	0.44	1.65	3.92	2.91					99.85	73.8107	0.330496	15.5233	1.36204	0.0400601	0.440661	1.65248	3.92589	2.91437	100
PDB(1995)		950	1.5	1.4	71.5	0.64	15.2	2.3	0.04	1.24	3.38	2.12	3.33					99.75	71.6792	0.641604	15.2381	2.30576	0.0401003	1.24311	3.38847	2.12531	3.33835	100
PDB(1995)		975	1.5	1.4	74	0.43	15.3	1.51	0.04	0.54	1.69	3.33	2.92					99.76	74.178	0.431034	15.3368	1.51363	0.0400962	0.541299	1.69407	3.33801	2.92702	100
PDB(1995)		1000	1.5	1.4	73.4	0.37	15.9	1.65	0.07	0.53	1.78	2.74	3.55					99.99	73.4073	0.370037	15.9016	1.65017	0.070007	0.530053	1.78018	2.74027	3.55036	100
LC(2001)	SL-30	950	0.4		65.31	0.94	17.95	5.9	0.03	1.05	5.28	3.05	0.49				88.46	100	65.31	0.94	17.95	5.9	0.03	1.05	5.28	3.05	0.49	100
LC(2001)	SL-1	850	0.6		70.65	0.22	15.42	3.38	0.13	1.07	5.6	2.78	0.75				89.94	100	70.65	0.22	15.42	3.38	0.13	1.07	5.6	2.78	0.75	100
LC(2001)	SL-18	900	0.6		67.15	0.84	16.3	4.9	0.04	2.45	6.02	1.64	0.66				84.5	100	67.15	0.84	16.3	4.9	0.04	2.45	6.02	1.64	0.66	100
LC(2001)	SL-31	950	0.6		63.11	1.27	19	3.84	0.04	2.12	5.97	4.31	0.32				89.59	99.98	63.1226	1.27025	19.0038	3.84077	0.040008	2.12042	5.97119	4.31086	0.320064	100
LC(2001)	SL-28	950	1		64.35	1.08	17.12	6.35		1.48	6.5	2.65	0.47				86.83	100	64.35	1.08	17.12	6.35	0	1.48	6.5	2.65	0.47	100
LC(2001)	SL-19	900	1.2		76.51	0.36	10.2	3.32		2.35	4.92	2.18	0.18				96.49	100.02	76.4947	0.359928	10.198	3.31934	0	2.34953	4.91902	2.17956	0.179964	100
LC(2001)	SL20	900	1.4		71.77	0.22	16.81	2.34		1.09	5	2.06	0.7				86.92	99.99	71.7772	0.220022	16.8117	2.34023	0	1.09011	5.0005	2.06021	0.70007	100
W(1996)	215B	951	1.52	5.12	66.9	0.92	16.9	4.02	0.07	1.27	4.25	4.94	0.74				87.61	100.01	66.8933	0.919908	16.8983	4.0196	0.069993	1.26987	4.24958	4.93951	0.739926	100
W(1996)	216A	951	1.56	2.68	69.7	0.53	14.8	3.73	0.19	0.31	3.16	6.41	1.17				91.37	100	69.7	0.53	14.8	3.73	0.19	0.31	3.16	6.41	1.17	100
W(1996)	315	1002	1.78	2.68	70.2	0.63	15.4	2.76		0.46	3.07	6.43	1.05				93.69	100	70.2	0.63	15.4	2.76	0	0.46	3.07	6.43	1.05	100
W(1996)	327B	902	2.09	5.12	71.7	0.37	15.5	2.83		0.65	2.79	5.46	0.68				87.68	99.98	71.7143	0.370074	15.5031	2.83057	0	0.65013	2.79056	5.46109	0.680136	100
W(1996)	329A	1041	2	2.68	72.1	0.69	14.7	2.65	0.16	0.53	2.17	6.11	0.85				91.62	99.96	72.1289	0.690276	14.7059	2.65106	0.160064	0.530212	2.17087	6.11244	0.85034	100
W(1996)	407B	838	0.889	13.8	65.1	0.42	18.7	5.65	0.1	1	6.58	2.09	0.32				83.76	99.96	65.1261	0.420168	18.7075	5.65226	0.10004	1.0004	6.58263	2.09084	0.320128	100
W(1996)	420	800	1.48	5.12	73.5	0.27	15.8	1.48		0.6	2.95	4.7	0.68				87.78	99.98	73.5147	0.270054	15.8032	1.4803	0	0.60012	2.95059	4.70094	0.680136	100
W(1996)	508B	795	0.594	15.2	69.4	0.28	17.9	3.25		0.77	4.93	2.92	0.52				87.07	99.97	69.4208	0.280084	17.9054	3.25098	0	0.770231	4.93148	2.92088	0.520156	100
W(1996)	516B	801	2.14	3.01	73.9	0.21	16	1.19	0.11	0.36	1.68	4.62	1.92				82.39	99.99	73.9074	0.210021	16.0016	1.19012	0.110011	0.360036	1.68017	4.62046	1.92019	100
W(1996)	517A	950	1.57	0.78	71.8	0.61	15.7	2.23	0.11	0.83	2.46	4.93	1.37				89.54	100.04	71.7713	0.609756	15.6937	2.22911	0.109956	0.829668	2.45902	4.92803	1.36945	100
W(1996)	517B	950	1.57	3.01	69.8	0.57	16.4	2.55		0.73	3.54	5.5	0.85				90.82	99.94	69.8419	0.570342	16.4098	2.55153	0	0.730438	3.54213	5.5033	0.85051	100
W(1996)	519B	900	1.02	3.01	71.3	0.32	15.7	3.64		0.74	3.79	3.61	0.95				88.85	100.05	71.2644	0.31984	15.6922	3.63818	0	0.73963	3.78811	3.6082	0.949525	100
W(1996)	520B	1104	2.95	3.01	72.9	1.04	14.2	2.75	0.06	0.69	3.23	4.14	0.92				87.43	99.93	72.9511	1.04073	14.2099	2.75193	0.060042	0.690483	3.23226	4.1429	0.920644	100
W(1996)	522B	1001	2.96	3.01	76.1	0.54	14.1	1.72	0.09	0.34	2.54	3.31	1.26				85.5	100	76.1	0.54	14.1	1.72	0.09	0.34	2.54	3.31	1.26	100
W(1996)	527A	998	1.52	0.78	71.7	0.58	15.5	2.5		0.49	2.39	5.58	1.36				92.66	100.1	71.6284	0.579421	15.4845	2.4975	0	0.48951	2.38761	5.57443	1.35864	100
W(1996)	529B	900	2.97	5.12	76.4	0.21	14	1.15	0.06	0.69	2.43	3.94	1.16				84.04	100.04	76.3695	0.209916	13.9944	1.14954	0.059976	0.689724	2.42903	3.93842	1.15954	100
A(2012)	1961	1100	3		68.88	0.71	13.43	3.57	0.06	3.46	6.1	1.94	1.85					100	68.88	0.71	13.43	3.57	0.06	3.46	6.1	1.94	1.85	100
A(2012)	1960	1100	2		54.59	0.41	17.61	8.4	0.19	9.35	8.3	0.6	0.49					99.94	54.6228	0.410246	17.6206	8.40504	0.190114	9.35561	8.30498	0.60036	0.490294	100
A(2012)	1958	1050	2		67.69	0.47	15.72	3.38	0.03	2.42	5.65	2.24	2.38					99.98	67.7035	0.470094	15.7231	3.38068	0.030006	2.42048	5.65113	2.24045	2.38048	100
A(2012)	1964	1100	1.5		56.62	0.53	18.95	6.51	0.02	5.61	9.04	1.47	1.1		0.01			99.86	56.7051	0.530796	18.9785	6.51978	0.02003	5.61843	9.05358	1.47221	1.10165	100
A(2012)	1971	1050	1.5		62.58	0.56	18.15	4.08	0.05	3.1	6.82	2.51	2.11		0.03			99.99	62.605	0.560224	18.1573	4.08163	0.05002	3.10124	6.82273	2.511	2.11084	100
A(2012)	1973*	1050	1.5		62.05	0.6	17.38	5.37	0.08	3.23	7.45	2.1	1.68		0.06			100	62.0873	0.60036	17.3904	5.37322	0.080048	3.23194	7.45447	2.10126	1.68101	100
A(2012)	1981	1000	1.5		61.75	0.63	18.01	4.82	0.07	3.5	7.58	2.07	1.53		0.03			99.99	61.7747	0.630252	18.0172	4.82193	0.070028	3.5014	7.58303	2.07083	1.53061	100
A(2012)	1963	1075	1		54.29	0.68	20	7.49	0.21	4.64	8.02	3.52	1.1		0.03			99.98	54.3172	0.68034	20.01	7.49375	0.210105	4.64232	8.02401	3.52176	1.10055	100
A(2012)	1969^2	1100	1	5	53.58	0.44	18.69	7.91	0.18	9	8.17	1.18	0.78		0.02			99.95	53.6175	0.440308	18.7031	7.91554	0.180126	9.0063	8.17572	1.18083	0.780546	100
A(2012)	1974	1050	1		53.2	0.52	20.74	7.78	0.18	5.58	0.97	9.6	1.39		0.02			99.98	53.2213	0.520208	20.7483	7.78311	0.180072	5.58223	0.970388	9.60384	1.39056	100
A(2012)	1962	1050	0.5		54.05	0.49	19.81	8.06	0.18	6.51	8.75	1.23	0.89		0.02			99.99	54.0662	0.490147	19.8159	8.06242	0.180054	6.51195	8.75263	1.23037	0.890267	100
A(2012)	R-91	1050	1.5		63.37	0.63	15.88	5.02	0.09	3.54	6.57	3.25	1.35		0.28			99.98	63.5607	0.631896	15.9278	5.03511	0.0902708	3.55065	6.58977	3.25978	1.35406	100
A(2012)	R102	950	2		71.74	0.46	14.11	2.41	0.03	1.39	3.58	3.94	2.03		0.28			99.97	71.9631	0.46143	14.1539	2.41749	0.0300933	1.39432	3.59113	3.95225	2.03631	100
A(2012)	1989	950	1.5		63.76	0.43	18.47	3.76	0.08	1.95	6.13	3.56	1.49		0.35			99.98	63.9968	0.431597	18.5386	3.77396	0.0802971	1.95724	6.15277	3.57322	1.49553	100
SPD(1995)	APD560	900	1		67.19	0.37	14.64	2.53	0.03	0.68	3.79	1.18	1.61		0.08			92.1	73.0167	0.402087	15.9096	2.7494	0.0326016	0.73897	4.11867	1.28233	1.74962	100
SPD(1995)	APD574	925	1		67.04	0.5	13.81	3.19	0.05	0.69	4.46	1.84	1.61		0.2			93.39	71.939	0.536538	14.8192	3.42311	0.0536538	0.740423	4.78592	1.97446	1.72765	100
SPD(1995)	APD542	950	1		65.68	0.6	14.86	3.49	0.05	0.81	4.68	1.64	1.43		0.14			93.38	70.4419	0.643501	15.9374	3.74303	0.0536251	0.868726	5.01931	1.7589	1.53368	100
SPD(2002)		900	1		70.53	0.57	17.48	2.23	0.06	0.94	4.09	3.16	0.95				91.21	100.01	70.5229	0.569943	17.4783	2.22978	0.059994	0.939906	4.08959	3.15968	0.949905	100
SPD(2002)		950	1		66.37	0.62	18.11	3.2	0.02	1.48	4.83	4.44	0.92				94.42	99.99	66.3766	0.620062	18.1118	3.20032	0.020002	1.48015	4.83048	4.44044	0.920092	100
SPD(2002)		1000	1		67.88	0.89	17.08	3.71	0.09	1.19	3.3	3.79	2.07				93.45	100	67.88	0.89	17.08	3.71	0.09	1.19	3.3	3.79	2.07	100
SPD(2002)		950	1.5		74.21	0.28	15.67	0.81	0.03	0.81	2.58	4.17	1.43				94.58	99.99	74.2174	0.280028	15.6716	0.810081	0.030003	0.810081	2.58026	4.17042	1.43014	100
SPD(2002)		1000	1.5		73	0.55	16.62	1.23	0.03	1.01	2.94	3.67	0.95				93.87	100	73	0.55	16.62	1.23	0.03	1.01	2.94	3.67	0.95	100
SPD(2002)		1050	1.5		71.43	0.76	15.76	2.3	0.06	1.02	2.55	3.96	2.15				94.65	99.99	71.4371	0.760076	15.7616	2.30023	0.060006	1.0201	2.55026	3.9604	2.15022	100
SPD(2002)		1050	1.8		70.97	0.71	17.05	1.15	0.03	1.08	4.08	3.84	1.08				94.78	99.99	70.9771	0.710071	17.0517	1.15012	0.030003	1.08011	4.08041	3.84038	1.08011	100
SPD(2002)		975	2.1		73.25	0.31	16.63	0.76	0.02	0.39	2.03	3.42	3.2				93.68	100.01	73.2427	0.309969	16.6283	0.759924	0.019998	0.389961	2.0298	3.41966	3.19968	100
SPD(2002)		1025	2.1		71.13	0.4	16.72	0.93	0.07	0.68	3.07	5.21	1.79				95.15	100	71.13	0.4	16.72	0.93	0.07	0.68	3.07	5.21	1.79	100
SPD(2002)		1050	2.1		70.64	0.53	16.54	1.37	0.13	0.83	3.78	4.56	1.62				96.06	100	70.64	0.53	16.54	1.37	0.13	0.83	3.78	4.56	1.62	100
SPD(2002)		1100	2.1		70.49	0.79	17.31	0.99	0.04	0.93	4.09	4.24	1.12				97.57	100	70.49	0.79	17.31	0.99	0.04	0.93	4.09	4.24	1.12	100
SPD(2002)		1025	2.7		75.71	0.19	15.52	0.57	0.02	0.26	1.53	2.68	3.53				88.99	100.01	75.7024	0.189981	15.5184	0.569943	0.019998	0.259974	1.52985	2.67973	3.52965	100
SPD(2002)		1075	2.7		75.65	0.13	15.8	0.56	0.02	0.2	1.17	2.8	3.67				90.34	100	75.65	0.13	15.8	0.56	0.02	0.2	1.17	2.8	3.67	100
SPD(2002)		1100	2.7		73.66	0.41	16.16	0.73	0.01	0.55	3.01	3.29	2.18				88.22	100	73.66	0.41	16.16	0.73	0.01	0.55	3.01	3.29	2.18	100
SPD(2002)		1125	2.7		73.25	0.57	15.9	0.92	0.03	0.55	3.04	3.55	2.2				91.94	100.01	73.2427	0.569943	15.8984	0.919908	0.029997	0.549945	3.0397	3.54965	2.19978	100
SPD(2002)		1150	2.7		71.65	0.74	16.57	1.13	0.02	0.66	3.83	3.61	1.8				94.42	100.01	71.6428	0.739926	16.5683	1.12989	0.019998	0.659934	3.82962	3.60964	1.79982	100
SPD(2002)		1000	3.2		74	0.3	14.93	0.57	0.03	0.31	1.61	3.1	5.13				91.49	99.98	74.0148	0.30006	14.933	0.570114	0.030006	0.310062	1.61032	3.10062	5.13103	100
SPD(2002)		1050	3.2		75.06	0.38	15.18	0.64	0.02	0.31	1.97	2.1	4.34				88.7	100	75.06	0.38	15.18	0.64	0.02	0.31	1.97	2.1	4.34	100
SPD(2002)		1100	3.2		69.88	1.24	16.36	1.65	0.02	0.96	4.7	3.53	1.66				93.27	100	69.88	1.24	16.36	1.65	0.02	0.96	4.7	3.53	1.66	100
Z(2013)		900	1.2		68.63	0.41	18.33	3.11	0.06	0.69	4.52	2.72	1.55					100.02	68.6163	0.409918	18.3263	3.10938	0.059988	0.689862	4.5191	2.71946	1.54969	100
Z(2013)		950	1.2		65.21	0.64	19.42	3.2	0.04	0.9	4.44	4.65	1.48					99.98	65.223	0.640128	19.4239	3.20064	0.040008	0.90018	4.44089	4.65093	1.4803	100
Z(2013)		1000	1.2		65.51	0.72	20.57	3.09	0.04	0.75	4.56	3.27	1.5					100.01	65.5034	0.719928	20.5679	3.08969	0.039996	0.749925	4.55954	3.26967	1.49985	100
Z(2013)		1000	1.2		61.97	0.94	20.23	4.43	0.1	1.17	4.82	5.04	1.29					99.99	61.9762	0.940094	20.232	4.43044	0.10001	1.17012	4.82048	5.0405	1.29013	100
Z(2014)		1100	1	0.5	52.41	0.72	19.64	3.85		4.23	8.76	1.37						90.98	57.6061	0.791383	21.5872	4.2317		4.64937	9.62849	1.50583		100
Z(2014)		1050	1.25	0.5	52.78	0.83	14.42	4.67		5.03	9.66	2.16						89.55	58.9391	0.926857	16.1027	5.21496		5.61697	10.7873	2.41206		100
Z(2014)		1100	1.25	0.5	61.72	1.14	14.87	3.39		2.44	5.1	3.29						91.95	67.1234	1.2398	16.1718	3.68679		2.65362	5.54649	3.57803		100
Z(2014)		1050	1.5	0.5	64.89	0.77	16.24	2.59		1.38	4.68	2.37						92.92	69.8343	0.82867	17.4774	2.78734		1.48515	5.03659	2.55058		100
Z(2014)		1100	1.5	0.5	57.96	0.88	19.9	1.97		2.81	6.6	3.09						93.21	62.1822	0.944105	21.3496	2.11351		3.0147	7.08079	3.31509		100
Z(2014)		1050	2	0.5	65.45	0.91	15.03	1.83		0.87	3.74	1.92						89.75	72.9248	1.01393	16.7465	2.039		0.969359	4.16713	2.13928		100
Z(2014)		1100	2	0.5	62.38	1.09	17.1	2.57		1.48	5.59	1.87						92.08	67.7454	1.18375	18.5708	2.79105		1.6073	6.07081	2.03084		100
Z(2014)		1100	1	0.47	51.39	0.71	21.96	3.47		3.11	8.28	2.36						91.28	56.2993	0.777826	24.0578	3.80149		3.4071	9.07099	2.58545		100
Z(2014)		1100	1.25	0.47	53.9	1.42	18.58	3.99		2.89	5.67	4						90.45	59.5909	1.56993	20.5417	4.41128		3.19514	6.26866	4.42233		100
Z(2014)		1050	1.5	0.47	61.73	0.94	16.27	3.21		2.14	4.25	2.32						90.86	67.9397	1.03456	17.9067	3.53291		2.35527	4.67753	2.55338		100
Z(2014)		1100	1.5	0.47	52.12	0.97	20.41	2.16		3.52	7.83	2.84						89.85	58.0078	1.07958	22.7156	2.40401		3.91764	8.71452	3.16082		100
Z(2014)		1050	2	0.47	64.91	0.94	14.1	2.12		1.51	3.45	1.84						88.87	73.0393	1.05772	15.8659	2.38551		1.69911	3.88207	2.07044		100
Z(2014)		1100	2	0.47	53.36	1.24	17.61	3.9		3.32	4.68	1.61						85.72	62.2492	1.44657	20.5436	4.5497		3.87308	5.45964	1.87821		100
Z(2014)		1050	1	0.45	50.2	0.49	20.45	3.6		5.52	8.18	2.59						91.03	55.1467	0.538284	22.4651	3.95474		6.06393	8.98605	2.84522		100
Z(2014)		1100		0.45	50.9	0.76	21.62	2.31		4.39	7.92	2.1						90	56.5556	0.844444	24.0222	2.56667		4.87778	8.8	2.33333		100
Z(2014)		1100	1.5	0.45	49.6	0.96	20.19	2.05		1.01	8.81	2.3						84.92	58.4079	1.13048	23.7753	2.41404		1.18935	10.3745	2.70843		100
Z(2014)		1050	2	0.45	42.08	0.91	18.71	8.46		15.39	5.09	0.43						91.07	46.2062	0.999231	20.5446	9.28956		16.8991	5.58911	0.472164		100

## Sheet: Table DR5 Trace elements (TE)
Raw trace element data for our tonalites determined by ion probe and LA-ICP-MS
ppm	Ti	Sr	Y	Zr	Nb	Ba	La	Ce	Pr	Nd	Gd	Tb	Dy	Ho	Yb	Lu	Ta	Th	U	Analytical technique
OJPgwe1-1.DAT	1732.3	268.05	4.7822	57.083	7.3201	62.289	6.4598	13.159	1.3475	4.7752	0.78862	0.15481	0.96195	0.08781	0.57858	0.092747	0.53641	0.77727	0.16642	Ion probe
OJPgwe1-2.DAT	1764.8	269.54	4.9119	57.807	8.2052	62.388	5.6108	13.496	1.5285	5.6835	0.94816	0.15805	1.0168	0.15158	0.17787	0.1117	0.30559	0.94978	0.46218	Ion probe
OJPgwe1-5.DAT	1722.9	270.8	4.8204	57.895	7.1417	59.205	6.4516	15.197	1.2502	5.6594	1.0934	0.20032	0.466	0.24242	0.56809	0.093477	0.60896	0.88544	0.57699	Ion probe
OJPgw13-1.DAT	2314.5	186.69	7.3935	77.985	8.111	60.108	6.0203	15.149	1.3418	7.2535	1.9337	0.11508	1.5092	0.24239	0.8232	0.24777	0.67104	0.72986	0.41366	Ion probe
OJPgw13-2.DAT (last 10 cycles)	2428.3	218.71	8.3869	87.135	8.0491	79.154	6.6292	14.885	1.7436	7.2238	1.0713	0.30162	2.0075	0.20007	0.60357	0.21833	0.53889	1.1592	0.39714	Ion probe
OJPgw13-3.DAT	2382.9	208.04	7.5394	80.661	8.257	70.058	7.6757	16.251	1.6749	8.5261	3.418	0.28295	2.2784	0.6766	1.0705	0.24241	0.51786	0.79303	0.55184	Ion probe
OJPgw11-1.DAT	1145.4	132.48	10.482	89.875	7.0681	67.008	7.9048	17.57	1.8189	10.373	1.7393	0.2071	1.2601	0.37535	1.3053	0.21058	0.73039	1.4326	0.61347	Ion probe
OJPgw11-2.DAT	1488.1	133.21	9.0415	82.502	6.2534	104.86	8.1121	19.39	1.5466	8.4766	2.0561	0.16495	1.9303	0.301	1.002	0.18536	0.48336	0.76367	0.33664	Ion probe
OJPgw11-3.DAT	1025.2	132.49	8.957	95.212	7.5813	125.99	8.764	23.426	1.8033	10.833	1.3505	0.21128	0.9302	0.3919	0.94746	0.19608	0.49033	1.2241	0.39314	Ion probe
OJPgw3 - 1	1667	188.3	13.13	89.93	6.056	96.13	7.7	11.31	1.93	7.201	2.22232	0.223158	3.11819	0.266667	2.67402	0.205143	0.247	0.815138	0.236443	LA-ICP-MS
OJPgw3 - 2	1554	204.6	10.32	95.37	6.374	117.4	7.143	17.62	1.574	12	2.21558	0.481684	2.82472	0.641493	1.01936		0.278	0.62994	0.563165	LA-ICP-MS
OJPgw3 - 3	1203	170.7	7.459	90.02	5.735	127.2	6.475	13.54	1.771	6.209	0.714105	0.103579	1.35077	0.633227	0.543073	0.296583	0.317	0.553448	0.0895619	LA-ICP-MS
OJPgw24 spot1i.DAT	2107.1	348.92	2.6692	59.736	9.9422	66.057	7.4338	17.249	1.9403	7.086	0.63648	0.1106	0.33067	0.06397		0.032617	0.41047	0.86271	0.072312	Ion probe
OJPgw24 spot1.DAT	2541.8	437.96	3.1659	92.244	15.516	90.775	10.237	22.192	2.4084	8.4868	0.48832	0.062411	0.40373	0.09975	0.30667	0.018652	1.2655	0.86729	0.59673	Ion probe
OJPgw24 spot3.DAT	1850.9	339.89	2.4917	60.497	8.2548	71.52	7.8722	14.977	1.7923											Ion probe
OJPgw24 spot4.DAT	1891.1	369.54	2.4484	60.724	10.695	69.984	8.4654	16.062	2.1261	8.2089	0.17322	0.20748	0.55019	0.078863	0.20642	0.011138	0.68592	0.86474	0.44251	Ion probe
OJP-GW9 spot1	1369	474.1	8.972	132.9	6.448	113.9	15.78	29.65	3.785	12.84	3.17979	0.320842	0.92256	0.667947	0.576468	0.250466	0.874	0.840362	0.396222	LA-ICP-MS
Average trace element analysis for each sample and associated errors*
	Ti	Sr	Y	Zr	Nb	Ba	La	Ce	Pr	Nd	Gd	Tb	Dy	Ho	Yb	Lu	Ta	Th	U
OJPgwe1 average	1740	269.463	4.83817	57.595	7.55567	61.294	6.17407	13.9507	1.3754	5.3727	0.943393	0.17106	0.814917	0.160603	0.441513	0.099308	0.483653	0.87083	0.401863
Error	24.3766	3.79446	0.425131	2.27548	0.508907	2.8481	0.711891	1.18643	0.2014	1.19301	0.278774	0.0615277	0.328369	0.0678196	0.218154	0.0451958	0.181877	0.324507	0.227935
OJPgw13 average	2375.23	204.48	7.77327	81.927	8.13903	69.7733	6.77507	15.4283	1.58677	7.6678	2.141	0.233217	1.9317	0.37302	0.832423	0.23617	0.57593	0.89403	0.454213
Error	29.523	3.42266	0.557489	2.80991	0.546375	3.13847	0.771373	1.28996	0.223989	1.46959	0.487076	0.0737779	0.538917	0.0933486	0.338135	0.0753	0.198407	0.341295	0.249104
OJPgw11 average	1219.57	132.727	9.4935	89.1963	6.9676	99.286	8.2603	20.1287	1.72293	9.8942	1.7153	0.194443	1.37353	0.356083	1.08492	0.19734	0.568027	1.14012	0.44775
Error	21.5177	2.69255	0.597116	2.84789	0.493843	3.67319	0.835121	1.45031	0.225799	1.60024	0.428082	0.0595159	0.432228	0.106399	0.409145	0.0746143	0.189338	0.371185	0.245328
OJPgw3 average	1474.67	187.867	10.303	91.7733	6.055	113.577	7.106	14.1567	1.75833	8.47	1.71733	0.269474	2.43123	0.513796	1.41215	0.250863	0.280667	0.666175	0.29639
Error	29.4933	15.7433	0.45865	0.917733	0.455514	6.66222	1.13128	0.882069	0.0228583	0.125356	0.1288	0.0283756	0.0325784	0.0719885	0.253515	0.00250435	0.0350833	0.0142562	0
OJPgw24 average	2097.72	374.077	2.6938	68.3002	11.102	74.584	8.5021	17.62	2.06677	7.92723	0.432673	0.12683	0.428197	0.080861	0.256545	0.0208023	0.787297	0.864913	0.370517
Error	36.5952	6.30799	0.450081	3.61945	0.877716	4.46545	1.18818	1.80853	0.350561	1.76099	0.140906	0.0501699	0.230512	0.0559029	0.147353	0.014194	0.308135	0.356836	0.298557
OJPgw9 average	1369	474.1	8.972	132.9	6.448	113.9	15.78	29.65	3.785	12.84	3.17979	0.320842	0.92256	0.667947	0.576468	0.250466	0.874	0.840362	0.396222
Error	27.38	39.7299	0.399399	1.329	0.485079	6.68119	2.51218	1.84742	0.049205	0.190032	0.238484	0.0337847	0.0123623	0.0935867	0.10349	0.00250038	0.10925	0.0179837	0
* Errors for ion probe data are the square root of the sum of the squares for each analysis. The errors for the LA-ICP-MS data are the percentage errors converted into ppm from deviation from the international standard BCR.
MORB normalised data
	Ba	Th	U	Nb	Ta	La	Ce	Sr	Pr	Nd	Zr	Ti	Gd	Tb	Dy	Y	Ho	Yb	Lu		K ppm (seeTable DR4)
OJPgwe1 average	9.72921	7.25692	8.55028	3.24278	3.66404	2.46963	1.86009	2.99404	1.04197	0.735986	0.778311	0.228947	0.256357	0.255313	0.179103	0.172792	0.159013	0.144758	0.218259		6.23599
Error	0.45208	2.70423	4.84968	0.218415	1.37786	0.284756	0.158191	0.0421606	0.152576	0.163426	0.0307497	0.00320745	0.0757538	0.0918324	0.0721689	0.0151832	0.0671481	0.071526	0.0993314
OJPgw13 average	11.0751	7.45025	9.66411	3.49315	4.36311	2.71003	2.05711	2.272	1.2021	1.05038	1.10712	0.312531	0.581793	0.348085	0.424549	0.277617	0.369327	0.272926	0.519055		4.97141
Error	0.49817	2.84412	5.30009	0.234496	1.50308	0.308549	0.171994	0.0380296	0.169689	0.201314	0.0379718	0.00388461	0.132358	0.110116	0.118443	0.0199103	0.0924244	0.110864	0.165495
OJPgw11 average	15.7597	9.50103	9.5266	2.99039	4.30323	3.30412	2.68382	1.47474	1.30525	1.35537	1.20536	0.160469	0.466114	0.290214	0.301875	0.339054	0.352558	0.355711	0.433714		7.33661
Error	0.583045	3.0932	5.21975	0.21195	1.43438	0.334048	0.193374	0.0299172	0.17106	0.219212	0.0384851	0.00283127	0.116327	0.0888297	0.0949952	0.0213256	0.105345	0.134146	0.163988
OJPgw3 average	18.028	5.55146	6.30617	2.59871	2.12626	2.8424	1.88756	2.08741	1.33207	1.16027	1.24018	0.194035	0.466667	0.4022	0.534336	0.367964	0.508708	0.463	0.551348		5.20591
Error	1.0575	0.118801	0	0.195499	0.265783	0.45251	0.117609	0.174926	0.0173169	0.0171721	0.0124018	0.0038807	0.035	0.0423516	0.0071601	0.0163803	0.0712757	0.0831196	0.00550406
OJPgw24 average	11.8387	7.20761	7.88335	4.76481	5.96437	3.40084	2.34933	4.15642	1.56574	1.08592	0.922976	0.276016	0.117574	0.189299	0.0941092	0.0962071	0.0800604	0.0841131	0.0457194		6.6439
Error	0.708801	2.97363	6.35227	0.376702	2.33435	0.475273	0.241137	0.0700887	0.265576	0.241232	0.0489115	0.00481516	0.0382898	0.0748805	0.0506621	0.0160743	0.0553494	0.0483125	0.0311957
OJPgw9 average	18.0794	7.00302	8.43025	2.76738	6.62121	6.312	3.95333	5.26778	2.86742	1.7589	1.79595	0.180132	0.864073	0.478869	0.20276	0.320429	0.661333	0.189006	0.550474		7.88091
Error	1.06051	0.149865	0	0.208188	0.827652	1.00487	0.246323	0.441443	0.0372765	0.0260318	0.0179595	0.00360263	0.0648055	0.0504249	0.00271699	0.0142642	0.0926601	0.0339311	0.00549534

## Sheet: Table DR6 TE slabfluid addition
Average trace element analysis for each sample
	Ba	Th	U	Nb	Ta	La	Ce	Sr	Pr	Nd	Zr	Ti	Gd	Tb	Dy	Y	Ho	Yb	Lu
OJPgwe1 average	61.294	0.87083	0.401863	7.55567	0.483653	6.17407	13.9507	269.463	1.3754	5.3727	57.595	1740	0.943393	0.17106	0.814917	4.83817	0.160603	0.441513	0.099308
OJPgw13 average	69.7733	0.89403	0.454213	8.13903	0.57593	6.77507	15.4283	204.48	1.58677	7.6678	81.927	2375.23	2.141	0.233217	1.9317	7.77327	0.37302	0.832423	0.23617
OJPgw11 average	99.286	1.14012	0.44775	6.9676	0.568027	8.2603	20.1287	132.727	1.72293	9.8942	89.1963	1219.57	1.7153	0.194443	1.37353	9.4935	0.356083	1.08492	0.19734
OJPgw3 average	113.577	0.666175	0.29639	6.055	0.280667	7.106	14.1567	187.867	1.75833	8.47	91.7733	1474.67	1.71733	0.269474	2.43123	10.303	0.513796	1.41215	0.250863
OJPgw24 average	74.584	0.864913	0.370517	11.102	0.787297	8.5021	17.62	374.077	2.06677	7.92723	68.3002	2097.72	0.432673	0.12683	0.428197	2.6938	0.080861	0.256545	0.0208023
OJPgw9 average	113.9	0.840362	0.396222	6.448	0.874	15.78	29.65	474.1	3.785	12.84	132.9	1369	3.17979	0.320842	0.92256	8.972	0.667947	0.576468	0.250466
Compositon of the slab-derived aqueous fluid
	Ba	Th	U	Nb	Ta	La	Ce	Sr	Pr*	Nd	Zr	Ti	Gd	Tb	Dy	Y	Ho	Yb	Lu	Estimated relative proportions that would affect slab-fluid
Mobility	0.53	0.38	0.29			0.56	0.51	0.41	0.41	0.31
Kroenke-type basalt average	8.6148	0.16156	0.051			1.9788	5.4428	80.9144	0.85	4.566										0.321667
Kwaimbaita-type basalt average	12.3079	0.253268	0.0920536			3.04911	8.40929	101.513	1.305	6.93911										0.321667
Singgalo-type basalt average	23.68	0.5212	0.1312			5.448	14.894	162.98	2.172	10.734										0.321667
Surface volcaniclastic from hole 1183	9.74	0.408	0.3965			4.395	10.035	130.65	1.595	8.17										0.025
High-Nb basalt	29.98	0.69775	0.21425			7.0925	16.3225	131.675	2.25	11.4325										0.01
Slab fluid composition	789.196	12.0941	2.90792	0	0	198.831	492.699	4743.24	59.6233	231.637	0	0	0	0	0	0	0	0	0
*Mobility factor for Pr is assumed to be the same as Sr
MORB-normalised tonalite-aqueous slab fluid mix (proportions of 96:4% respectively)
X	0.04
	Ba	Th	U	Nb	Ta	La	Ce	Sr	Pr	Nd	Zr	Ti	Gd	Tb	Dy	Y	Ho	Yb	Lu	K ppm (seeTable DR4)
MORB	6.3	0.12	0.047	2.33	0.132	2.5	7.5	90	1.32	7.3	74	7600	3.68	0.67	4.55	28	1.01	3.05	0.455
OJPgwe1 average	14.3508	10.998	10.6831	3.11306	3.51748	5.55213	4.41341	4.98238	2.80706	1.97579	0.747178	0.219789	0.246103	0.245101	0.171938	0.16588	0.152653	0.138968	0.209529	16.6567
OJPgw13 average	15.6429	11.1836	11.7524	3.35342	4.18858	5.78292	4.60255	4.28923	2.96078	2.27761	1.06284	0.300029	0.558522	0.334161	0.407567	0.266512	0.354554	0.262009	0.498293	15.4427
OJPgw11 average	20.1401	13.1524	11.6204	2.87077	4.1311	6.35325	5.2042	3.52386	3.05981	2.5704	1.15714	0.154051	0.44747	0.278605	0.2898	0.325491	0.338455	0.341483	0.416366	17.7133
OJPgw3 average	22.3177	9.36078	8.52875	2.49476	2.04121	5.91	4.43978	4.11202	3.08555	2.38311	1.19057	0.186274	0.448	0.386112	0.512962	0.353246	0.48836	0.44448	0.529294	15.6678
OJPgw24 average	16.3759	10.9507	10.0428	4.57421	5.72579	6.4461	4.88309	6.09827	3.30988	2.31173	0.886057	0.264976	0.112871	0.181727	0.0903448	0.0923589	0.076858	0.0807486	0.0438906	17.0483
OJPgw9 average	22.367	10.7543	10.5679	2.65669	6.35636	9.24081	6.42293	7.16518	4.55949	2.95779	1.72411	0.172926	0.82951	0.459714	0.19465	0.307611	0.63488	0.181446	0.528455	18.2358
